# Supplementary material
Source: PubMed Central journal article supplement (PMC2776433)
Supplement: 0904849106_ST1_PDF.pdf [file 0904849106_ST1_PDF.pdf]

**Table S1: List of genes differentially regulated in AdshPdx1-infected Min6 cells relative to AdshLuc-infected (dataset 1) or untreated (dataset 2) cells**

**Dataset 1: AdshPdx1 vs AdshLuc-infected Min6 cells**

| ELEMENT_ID | NAME         | DESCRIPTION                                                                                            | FC    | q-value(%) |
|------------|--------------|--------------------------------------------------------------------------------------------------------|-------|------------|
| 14188509   | Slc39a8      | solute carrier family 39 (metal ion transporter), member 8                                             | -3.02 | 0          |
| 14182673   | 2532         |                                                                                                        | -2.34 | 0          |
| 14182061   | Setd5        | SET domain containing 5                                                                                | -2.13 | 0          |
| 14178715   | Plagl1       | pleiomorphic adenoma gene-like 1                                                                       | -1.98 | 0          |
| 14191070   | Wfs1         | Wolfram syndrome 1 homolog (human) monocyte to macrophage differentiation-associated 2                 | -1.92 | 0          |
| 14178004   | Mmd2         |                                                                                                        | -1.81 | 0          |
| 14192498   | Plagl1       | pleiomorphic adenoma gene-like 1 brain abundant, membrane attached                                     | -1.78 | 0          |
| 14190945   | Basp1        | signal protein 1                                                                                       | -1.75 | 0          |
| 14183846   | Hmgcs1       | 3-hydroxy-3-methylglutaryl-Coenzyme A synthase 1                                                       | -1.75 | 0          |
| 14181346   | Gpd2         | glycerol phosphate dehydrogenase 2, mitochondrial                                                      | -1.73 | 0          |
| 14183251   | Iqgap2       | IQ motif containing GTPase activating protein 2                                                        | -1.71 | 0          |
| 14187020   | Kng1         | kininogen 1                                                                                            | -1.68 | 0          |
| 14178800   | Matr3        | matrin 3                                                                                               | -1.65 | 0          |
| 14181652   | Nnat         | neuronatin                                                                                             | -1.65 | 0          |
| 14185872   | Slc2a2       | solute carrier family 2 (facilitated glucose transporter), member 2                                    | -1.62 | 0          |
| 14191943   | Bmpr1a       | bone morphogenetic protein receptor, type 1A                                                           | -1.59 | 0          |
| 14186177   | Cntrob       | centrobin, centrosomal BRCA2 interacting protein                                                       | -1.58 | 0          |
| 14188049   | Mafa         | v-maf musculoaponeurotic fibrosarcoma oncogene family, protein A (avian)                               | -1.57 | 0          |
| 14181667   | 7254         |                                                                                                        | -1.56 | 0          |
| 14182695   | Ero1lb       | ERO1-like beta (S. cerevisiae)                                                                         | -1.56 | 0          |
| 14180627   | Calu; Wdr20a | calumenin; WD repeat domain 20a                                                                        | -1.56 | 0          |
| 14180967   | Mitf         | microphthalmia-associated transcription factor                                                         | -1.56 | 0          |
| 14189575   | Psmc4        | proteasome (prosome, macropain) 26S subunit, non-ATPase, 4                                             | -1.53 | 0          |
| 14192088   | Ero1l        | ERO1-like (S. cerevisiae)                                                                              | -1.52 | 0          |
| 14185231   | Cfl2         | cofilin 2, muscle                                                                                      | -1.52 | 0          |
| 14190934   | Rik          | RIKEN cDNA 2610209M04 gene protein C; PAX interacting (with transcription-activation domain) protein 1 | -1.52 | 0          |
| 14188181   | Proc; Paxip1 |                                                                                                        | -1.52 | 0          |
| 14189016   | Epha1        | Eph receptor A1                                                                                        | -1.51 | 0          |
| 14187738   | Crelid2      | cysteine-rich with EGF-like domains 2                                                                  | -1.51 | 0          |
| 14189425   | Ero1lb       | ERO1-like beta (S. cerevisiae)                                                                         | -1.50 | 0          |
| 14181627   | Scd2         | stearoyl-Coenzyme A desaturase 2                                                                       | -1.50 | 0          |
| 14192389   | Hipk2        | homeodomain interacting protein kinase                                                                 | -1.50 | 0          |

|          |            | 2                                                                                              |       |      |
|----------|------------|------------------------------------------------------------------------------------------------|-------|------|
| 14179505 | Gcnt1      | glucosaminyl (N-acetyl) transferase 1,<br>core 2                                               | -1.50 | 0    |
| 14188311 | Pax4       | paired box gene 4                                                                              | -1.49 | 0.94 |
|          | IMAGE=643  |                                                                                                |       |      |
| 14179896 | 4688       |                                                                                                | -1.49 | 0    |
| 14185878 | Pdia4      | protein disulfide isomerase associated 4                                                       | -1.49 | 0    |
| 14184417 | Calu       | calumenin                                                                                      | -1.48 | 0    |
|          | IMAGE=643  |                                                                                                |       |      |
| 14191721 | 0415       |                                                                                                | -1.48 | 0.94 |
| 14187622 | Cbfb       | core binding factor beta                                                                       | -1.48 | 0    |
| 14185525 | Calu       | calumenin                                                                                      | -1.48 | 0    |
|          | IMAGE=643  |                                                                                                |       |      |
| 14185094 | 4504       |                                                                                                | -1.47 | 0    |
|          |            | immunoglobulin superfamily, member<br>4A                                                       |       |      |
| 14183308 | Igsf4a     |                                                                                                | -1.47 | 0.94 |
| 14189328 | Xlkd1      | extra cellular link domain-containing 1                                                        | -1.46 | 0    |
| 14182504 | Fst        | follistatin                                                                                    | -1.46 | 0    |
|          |            | suppressor of zeste 12 homolog<br>(Drosophila)                                                 |       |      |
| 14187465 | Suz12      |                                                                                                | -1.46 | 0    |
| 14182327 | Matr3      | matrin 3                                                                                       | -1.46 | 0    |
| 14185807 | 2-Sep      | septin 2                                                                                       | -1.46 | 0    |
|          |            | protein kinase, cAMP dependent<br>regulatory, type II alpha                                    |       |      |
| 14189004 | Prkar2a    |                                                                                                | -1.45 | 0    |
|          | 0610007P14 |                                                                                                |       |      |
| 14189383 | Rik        | RIKEN cDNA 0610007P14 gene                                                                     | -1.44 | 0    |
| 14183415 | G6pc2      | glucose-6-phosphatase, catalytic, 2                                                            | -1.44 | 0.94 |
| 14191041 | Cfl2       | cofilin 2, muscle                                                                              | -1.44 | 0    |
|          |            | pleckstrin homology domain containing,<br>family J member 1                                    |       |      |
| 14182672 | Plekhj1    |                                                                                                | -1.44 | 0    |
| 14191236 | Vrk1       | vaccinia related kinase 1                                                                      | -1.43 | 0.94 |
|          |            | DnaJ (Hsp40) homolog, subfamily C,<br>member 10                                                |       |      |
| 14178884 | Dnajc10    |                                                                                                | -1.43 | 0    |
|          | 2610209M04 |                                                                                                |       |      |
| 14190410 | Rik        | RIKEN cDNA 2610209M04 gene                                                                     | -1.43 | 0    |
| 14179072 | Cul3       | cullin 3                                                                                       | -1.43 | 0    |
| 14178910 | Unknown    |                                                                                                | -1.43 | 0.51 |
|          | COX1;      | cytochrome c oxidase subunit I;                                                                |       |      |
| 14183525 | COX2       | cytochrome c oxidase subunit II                                                                | -1.43 | 0.51 |
| 14192470 | BC013481   | cDNA sequence BC013481                                                                         | -1.42 | 0    |
| 14188347 | Oat        | ornithine aminotransferase                                                                     | -1.42 | 0    |
| 14188028 | Cul3       | cullin 3                                                                                       | -1.41 | 0.94 |
| 14182206 | Purb       | purine rich element binding protein B<br>low density lipoprotein receptor-related<br>protein 2 | -1.41 | 2.07 |
| 14186474 | Lrp2       |                                                                                                | -1.41 | 0.94 |
|          |            | signal peptidase complex subunit 3<br>homolog (S. cerevisiae)                                  |       |      |
| 14182858 | Spcs3      |                                                                                                | -1.41 | 2.07 |
| 14180481 | Cggbp1     | CGG triplet repeat binding protein 1                                                           | -1.41 | 0    |
| 14191133 | Cbfb       | core binding factor beta                                                                       | -1.41 | 0    |
| 14184654 | Prss2      | protease, serine, 2                                                                            | -1.41 | 0    |
|          |            | CUG triplet repeat, RNA binding protein<br>2                                                   |       |      |
| 14190854 | Cugbp2     |                                                                                                | -1.40 | 0.51 |
|          |            | serine (or cysteine) peptidase inhibitor,<br>clade E, member 2                                 |       |      |
| 14182553 | Serpine2   |                                                                                                | -1.40 | 0.94 |
|          |            | ash1 (absent, small, or homeotic)-like<br>(Drosophila)                                         |       |      |
| 14185849 | Ash1l      |                                                                                                | -1.40 | 0.51 |
|          | COX1;      | cytochrome c oxidase subunit I;                                                                |       |      |
| 14191435 | COX2       | cytochrome c oxidase subunit II                                                                | -1.40 | 5.04 |

|          |             |                                                                                                         |      |      |
|----------|-------------|---------------------------------------------------------------------------------------------------------|------|------|
| 14188850 | Caskin2     | cask-interacting protein 2<br>Rho guanine nucleotide exchange                                           | 1.40 | 0.74 |
| 14183638 | Arhgef19    | factor (GEF) 19                                                                                         | 1.41 | 2.6  |
| 14187726 | Adfp        | adipose differentiation related protein                                                                 | 1.42 | 0.74 |
| 14186581 | Gcg         | glucagon<br>S100 calcium binding protein A6                                                             | 1.43 | 4.17 |
| 14186851 | S100a6      | (calcyclin)<br>ectonucleotide                                                                           | 1.43 | 0.74 |
| 14178130 | Enpp5       | pyrophosphatase/phosphodiesterase 5<br>S100 calcium binding protein A6                                  | 1.43 | 0.74 |
| 14178578 | S100a6      | (calcyclin)                                                                                             | 1.43 | 2.6  |
| 14180042 |             | GENBANK=CF622970                                                                                        | 1.44 | 0.74 |
| 14179424 | Fhl2        | four and a half LIM domains 2<br>transformation related protein 53                                      | 1.45 | 0.74 |
| 14189600 | Trp53inp1   | inducible nuclear protein 1<br>nuclear receptor subfamily 4, group A,                                   | 1.46 | 0.51 |
| 14178519 | Nr4a1       | member 1                                                                                                | 1.46 | 0.51 |
| 14190571 | Gcg         | glucagon                                                                                                | 1.46 | 0.74 |
| 14185326 | Pgam1       | phosphoglycerate mutase 1                                                                               | 1.47 | 0    |
| 14187150 | Gpx2        | glutathione peroxidase 2                                                                                | 1.47 | 0.51 |
| 14184007 | Fhl1        | four and a half LIM domains 1                                                                           | 1.48 | 0.74 |
| 14182491 | Rpl17       | ribosomal protein L17                                                                                   | 1.48 | 0.74 |
| 14185290 | Plk2        | polo-like kinase 2 (Drosophila)                                                                         | 1.49 | 0.51 |
| 14190331 | Gstt1       | glutathione S-transferase, theta 1<br>G protein-coupled receptor, family C,                             | 1.49 | 0.51 |
| 14189995 | Gprc5c      | group 5, member C                                                                                       | 1.50 | 0.51 |
| 14182878 | Lrpprc      | leucine-rich PPR-motif containing                                                                       | 1.51 | 0.51 |
| 14186891 | Arhgap6     | Rho GTPase activating protein 6                                                                         | 1.51 | 0.51 |
| 14178793 | Mir16       | membrane interacting protein of RGS16                                                                   | 1.51 | 0.51 |
| 14183027 | Cd9         | CD9 antigen<br>dehydrogenase/reductase (SDR family)                                                     | 1.52 | 0    |
| 14191231 | Dhrs3       | member 3<br>hydroxyacyl-Coenzyme A                                                                      | 1.52 | 0.74 |
| 14183693 | Hadh; Ddx23 | dehydrogenase; DEAD (Asp-Glu-Ala-<br>Asp) box polypeptide 23                                            | 1.55 | 0    |
| 14184921 | Serpina1c   | serine (or cysteine) peptidase inhibitor,<br>clade A, member 1c<br>cyclin-dependent kinase inhibitor 1A | 1.62 | 0    |
| 14188851 | Cdkn1a      | (P21)                                                                                                   | 1.66 | 0    |
| 14192209 | Ppy         | pancreatic polypeptide                                                                                  | 1.67 | 0    |
| 14192234 | Tspan8      | tetraspanin 8                                                                                           | 1.70 | 0    |
| 14189191 | Serpina1c   | serine (or cysteine) peptidase inhibitor,<br>clade A, member 1c                                         | 1.74 | 0    |

**Dataset 2: AdshPdx1 vs uninfected Min6 cells**

| ELEMENT_ID | NAME                          | DESCRIPTION                                                                 | FC    | q-value (%) |
|------------|-------------------------------|-----------------------------------------------------------------------------|-------|-------------|
| 14188509   | Slc39a8                       | solute carrier family 39 (metal ion transporter), member 8                  | -2.59 | 0           |
| 14182061   | Setd5                         | SET domain containing 5                                                     | -2.42 | 0           |
| 14182673   | IMAGE=56<br>82532             |                                                                             | -2.37 | 0           |
| 14188555   | Dusp3                         | dual specificity phosphatase 3 (vaccinia virus phosphatase VH1-related)     | -2.05 | 0           |
| 14191070   | Wfs1                          | Wolfram syndrome 1 homolog (human)                                          | -2.05 | 0           |
| 14190349   | Capg;<br>Spp1                 | capping protein (actin filament), gelsolin-like; secreted phosphoprotein 1  | -1.91 | 0           |
| 14189825   | Cldn4                         | claudin 4                                                                   | -1.91 | 0           |
| 14183846   | Hmgcs1                        | 3-hydroxy-3-methylglutaryl-Coenzyme A synthase 1 monocyte to macrophage     | -1.91 | 0           |
| 14178004   | Mmd2                          | differentiation-associated 2                                                | -1.87 | 0           |
| 14184774   | Ero1l                         | ERO1-like (S. cerevisiae)                                                   | -1.84 | 0           |
| 14188181   | Proc;<br>Paxip1               | protein C; PAX interacting (with transcription-activation domain) protein 1 | -1.77 | 0           |
| 14182327   | Matr3                         | matrin 3                                                                    | -1.77 | 0           |
| 14181627   | Scd2                          | stearoyl-Coenzyme A desaturase 2                                            | -1.74 | 1           |
| 14184224   | Tcf21                         | transcription factor 21                                                     | -1.73 | 0           |
| 14182387   | Spp1                          | secreted phosphoprotein 1                                                   | -1.73 | 0           |
| 14183415   | G6pc2                         | glucose-6-phosphatase, catalytic, 2                                         | -1.72 | 0           |
| 14178715   | Plagl1                        | pleiomorphic adenoma gene-like 1                                            | -1.71 | 0           |
| 14183647   | Spp1                          | secreted phosphoprotein 1                                                   | -1.70 | 0           |
| 14186073   | IMAGE=56<br>82925<br>2210010C |                                                                             | -1.68 | 0           |
| 14185342   | 04Rik                         | RIKEN cDNA 2210010C04 gene                                                  | -1.68 | 0           |
| 14191721   | 30415                         |                                                                             | -1.67 | 0           |
| 14182695   | Ero1lb                        | ERO1-like beta (S. cerevisiae)                                              | -1.67 | 0           |
| 14180283   | 08Rik                         | RIKEN cDNA 2900001G08 gene                                                  | -1.65 | 0           |
| 14180134   | Ctrb1                         | chymotrypsinogen B1                                                         | -1.65 | 0           |
| 14192088   | Ero1l                         | ERO1-like (S. cerevisiae)                                                   | -1.64 | 0           |
| 14184590   | D1Ertd471<br>e                | DNA segment, Chr 1, ERATO Doi 471, expressed                                | -1.62 | 0           |
| 14191536   | Ero1l                         | ERO1-like (S. cerevisiae)                                                   | -1.62 | 0           |
| 14180383   | Susd2                         | sushi domain containing 2                                                   | -1.62 | 0           |
| 14182669   | Actg1                         | actin, gamma, cytoplasmic 1                                                 | -1.61 | 0           |
| 14189383   | 0610007P<br>14Rik             | RIKEN cDNA 0610007P14 gene                                                  | -1.60 | 0           |
| 14185094   | IMAGE=64                      |                                                                             | -1.58 | 0           |

|          |                   |                                                                                    |       |   |
|----------|-------------------|------------------------------------------------------------------------------------|-------|---|
| 14185283 | 34504<br>Cd164    | CD164 antigen                                                                      | -1.58 | 0 |
| 14192230 | Hspa5             | heat shock 70kD protein 5<br>(glucose-regulated protein)                           | -1.58 | 0 |
| 14179129 | Trpm8             | transient receptor potential cation<br>channel, subfamily M, member 8              | -1.57 | 0 |
| 14185872 | Slc2a2            | solute carrier family 2 (facilitated<br>glucose transporter), member 2             | -1.56 | 0 |
| 14185219 | Spp1;             | secreted phosphoprotein 1; golgi                                                   | -1.56 | 0 |
| 14192498 | Golph4            | phosphoprotein 4                                                                   | -1.56 | 0 |
| 14189425 | Plagl1            | pleiomorphic adenoma gene-like 1                                                   | -1.56 | 0 |
| 14184251 | Ero1lb            | ERO1-like beta ( <i>S. cerevisiae</i> )                                            | -1.56 | 0 |
| 14184251 | Slc1a4            | solute carrier family 1<br>(glutamate/neutral amino acid<br>transporter), member 4 | -1.54 | 0 |
| 14190188 | Tmed10            | transmembrane emp24-like<br>trafficking protein 10 (yeast)                         | -1.54 | 0 |
| 14192389 | Hipk2             | homeodomain interacting protein<br>kinase 2                                        | -1.54 | 0 |
| 14180967 | Mitf              | microphthalmia-associated<br>transcription factor                                  | -1.54 | 0 |
| 14179896 | IMAGE=64<br>34688 |                                                                                    | -1.54 | 0 |
| 14178948 | Ero1l             | ERO1-like ( <i>S. cerevisiae</i> )                                                 | -1.53 | 0 |
| 14181870 | Trib3             | tribbles homolog 3 ( <i>Drosophila</i> )                                           | -1.53 | 0 |
| 14191174 | Cel               | carboxyl ester lipase                                                              | -1.53 | 0 |
| 14180285 | IMAGE=46<br>6628  |                                                                                    | -1.53 | 0 |
| 14192470 | BC013481          | cDNA sequence BC013481                                                             | -1.53 | 0 |
| 14181578 | Mc3r              | melanocortin 3 receptor                                                            | -1.53 | 0 |
| 14189016 | Epha1             | Eph receptor A1                                                                    | -1.52 | 0 |
| 14190238 | Tfpi              | tissue factor pathway inhibitor                                                    | -1.52 | 0 |
| 14179072 | Cul3              | cullin 3                                                                           | -1.52 | 0 |
| 14182239 | Cdc34             | cell division cycle 34 homolog ( <i>S.</i><br><i>cerevisiae</i> )                  | -1.52 | 0 |
| 14181898 | Hyou1             | hypoxia up-regulated 1                                                             | -1.52 | 0 |
| 14187407 | Ela2a             | elastase 2A                                                                        | -1.51 | 0 |
| 14182544 | IMAGE=64<br>30417 |                                                                                    | -1.50 | 1 |
| 14182032 | Pdia6             | protein disulfide isomerase<br>associated 6                                        | -1.50 | 1 |
| 14186474 | Lrp2              | low density lipoprotein receptor-<br>related protein 2                             | -1.50 | 0 |
| 14179868 | Cdh1              | cadherin 1                                                                         | -1.50 | 0 |
| 14187648 | Tacc1             | transforming, acidic coiled-coil<br>containing protein 1                           | -1.50 | 0 |
| 14184502 | Asns              | asparagine synthetase                                                              | -1.49 | 0 |
| 14192565 | BC013481          | cDNA sequence BC013481                                                             | -1.49 | 0 |
| 14188049 | Mafa              | v-maf musculoaponeurotic<br>fibrosarcoma oncogene family,<br>protein A (avian)     | -1.49 | 0 |
| 14182858 | Spcs3             | signal peptidase complex subunit 3<br>homolog ( <i>S. cerevisiae</i> )             | -1.49 | 0 |
| 14184000 | Bmi1              | B lymphoma Mo-MLV insertion<br>region 1                                            | -1.49 | 0 |

|          |                |                                                                        |       |   |
|----------|----------------|------------------------------------------------------------------------|-------|---|
| 14185607 | Ppgb           | protective protein for beta-galactosidase                              | -1.49 | 0 |
| 14183251 | Iqgap2         | IQ motif containing GTPase activating protein 2                        | -1.49 | 0 |
| 14186769 | Tram1          | translocating chain-associating membrane protein 1                     | -1.49 | 0 |
| 14181652 | Nnat           | neuronatin                                                             | -1.47 | 0 |
| 14185231 | Cfl2           | cofilin 2, muscle                                                      | -1.47 | 0 |
| 14189834 | Aldh18a1       | aldehyde dehydrogenase 18 family, member A1                            | -1.47 | 0 |
| 14185220 | Dlk1;<br>Phgdh | delta-like 1 homolog (Drosophila);<br>3-phosphoglycerate dehydrogenase | -1.47 | 0 |
| 14181346 | Gpd2           | glycerol phosphate dehydrogenase 2, mitochondrial                      | -1.47 | 0 |
| 14181192 | Fads1          | fatty acid desaturase 1                                                | -1.46 | 0 |
| 14188311 | Pax4           | paired box gene 4                                                      | -1.46 | 1 |
| 14190348 | Hnrpf          | heterogeneous nuclear ribonucleoprotein F                              | -1.46 | 0 |
| 14189555 | Atp7a          | ATPase, Cu <sup>++</sup> transporting, alpha polypeptide               | -1.46 | 0 |
| 14190098 | Insig2         | insulin induced gene 2                                                 | -1.46 | 0 |
| 14187738 | Creld2         | cysteine-rich with EGF-like domains 2                                  | -1.46 | 0 |
| 14179454 | Pdia6          | protein disulfide isomerase associated 6                               | -1.46 | 0 |
| 14191953 | Rtn3           | reticulum 3                                                            | -1.45 | 0 |
| 14187034 | Camk2d         | calcium/calmodulin-dependent protein kinase II, delta                  | -1.45 | 0 |
| 14189004 | Prkar2a        | protein kinase, cAMP dependent regulatory, type II alpha               | -1.45 | 0 |
| 14182504 | Fst            | follistatin                                                            | -1.45 | 0 |
| 14181579 | Onecut2        | one cut domain, family member 2                                        | -1.45 | 1 |
| 14182959 | Cpe            | carboxypeptidase E                                                     | -1.45 | 1 |
| 14192173 | 3Rik           | 2610002F0                                                              | -1.45 | 0 |
| 14179606 | Ankrd57        | RIKEN cDNA 2610002F03 gene<br>ankyrin repeat domain 57                 | -1.45 | 0 |
| 14189575 | Psm4           | proteasome (prosome, macropain) 26S subunit, non-ATPase, 4             | -1.45 | 0 |
| 14191943 | Bmpr1a         | bone morphogenetic protein receptor, type 1A                           | -1.45 | 0 |
| 14178190 | Scd1           | stearoyl-Coenzyme A desaturase 1                                       | -1.44 | 0 |
| 14185189 | Mcf2           | multiple coagulation factor deficiency 2                               | -1.44 | 0 |
| 14187596 | Scd2           | stearoyl-Coenzyme A desaturase 2                                       | -1.44 | 0 |
| 14182649 | Ncam1          | neural cell adhesion molecule 1                                        | -1.44 | 0 |
| 14183845 | Gphn           | gephyrin                                                               | -1.44 | 0 |
| 14182527 | Arnt2          | aryl hydrocarbon receptor nuclear translocator 2                       | -1.44 | 0 |
| 14182935 | Cox7a2l        | cytochrome c oxidase subunit VIIa polypeptide 2-like                   | -1.44 | 0 |
| 14187414 | Dhrs7          | dehydrogenase/reductase (SDR family) member 7                          | -1.44 | 0 |

|          |                    |                                                                                                          |       |   |
|----------|--------------------|----------------------------------------------------------------------------------------------------------|-------|---|
| 14185045 | Edem3              | ER degradation enhancer,<br>mannosidase alpha-like 3                                                     | -1.43 | 0 |
| 14181715 | H19                | H19 fetal liver mRNA                                                                                     | -1.43 | 0 |
| 14185451 | Entpd4             | ectonucleoside triphosphate<br>diphosphohydrolase 4<br>centrobin, centrosomal BRCA2                      | -1.43 | 0 |
| 14186177 | Cntrob             | interacting protein                                                                                      | -1.43 | 0 |
| 14178517 | Sox15              | SRY-box containing gene 15                                                                               | -1.43 | 1 |
| 14190776 | 30091              |                                                                                                          | -1.43 | 0 |
| 14180065 | Vdp                | vesicle docking protein                                                                                  | -1.43 | 0 |
| 14186524 | 3Rik               | RIKEN cDNA D330050I23 gene                                                                               | -1.42 | 0 |
| 14190759 | Pax7               | paired box gene 7                                                                                        | -1.42 | 1 |
| 14190381 | 08Rik              | RIKEN cDNA 2610020O08 gene                                                                               | -1.42 | 0 |
| 14186571 | Txndc1             | thioredoxin domain containing 1                                                                          | -1.42 | 0 |
| 14181554 | 3Rik               | RIKEN cDNA D330050I23 gene<br>3-phosphoglycerate                                                         | -1.42 | 1 |
| 14179711 | Phgdh              | dehydrogenase                                                                                            | -1.42 | 0 |
| 14180784 | Nucb2              | nucleobindin 2                                                                                           | -1.41 | 1 |
| 14189452 | Tbc1d10b           | TBC1 domain family, member 10b                                                                           | -1.41 | 1 |
| 14186560 | Ctrb1              | chymotrypsinogen B1                                                                                      | -1.41 | 1 |
| 14191041 | Cfl2               | cofilin 2, muscle                                                                                        | -1.41 | 0 |
| 14184696 | Igf1r              | insulin-like growth factor I receptor                                                                    | -1.41 | 0 |
| 14183763 | Lman1              | lectin, mannose-binding, 1                                                                               | -1.41 | 0 |
| 14190079 | Col6a3             | procollagen, type VI, alpha 3                                                                            | -1.41 | 0 |
| 14184882 | Ccnd2              | cyclin D2                                                                                                | -1.41 | 0 |
| 14182983 | AW549877<br>; Opa1 | expressed sequence AW549877;<br>optic atrophy 1 homolog (human)                                          | -1.41 | 0 |
| 14180966 | Irs2               | insulin receptor substrate 2                                                                             | -1.41 | 1 |
| 14186795 | Eif3s5             | eukaryotic translation initiation<br>factor 3, subunit 5 (epsilon)<br>ATP-binding cassette, sub-family A | -1.41 | 2 |
| 14189299 | Abca5              | (ABC1), member 5                                                                                         | -1.40 | 0 |
| 14188255 | Tjp1               | tight junction protein 1                                                                                 | -1.40 | 0 |
| 14184482 | D130073L<br>02Rik  | RIKEN cDNA D130073L02 gene<br>multiple coagulation factor                                                | -1.40 | 0 |
| 14189887 | Mcf2               | deficiency 2                                                                                             | -1.40 | 0 |
| 14178172 | Fzd7               | frizzled homolog 7 (Drosophila)<br>acylphosphatase 1, erythrocyte                                        | -1.40 | 0 |
| 14189584 | Acyp1              | (common) type                                                                                            | 1.40  | 0 |
| 14182326 | Aurkb              | aurora kinase B<br>low density lipoprotein receptor-<br>related protein 6                                | 1.40  | 1 |
| 14180484 | Lrp6               |                                                                                                          | 1.40  | 0 |
| 14188993 | Cotl1              | coactosin-like 1 (Dictyostelium)                                                                         | 1.40  | 0 |
| 14190571 | Gcg                | glucagon                                                                                                 | 1.40  | 0 |
| 14189972 | C130032J<br>12Rik  | RIKEN cDNA C130032J12 gene                                                                               | 1.41  | 0 |
| 14181595 | Rps25              | ribosomal protein S25<br>myosin, light polypeptide 6, alkali,                                            | 1.41  | 0 |
| 14188158 | Myl6               | smooth muscle and non-muscle                                                                             | 1.41  | 1 |
| 14182491 | Rpl17              | ribosomal protein L17                                                                                    | 1.41  | 0 |

|          |          |                                                                                                   |      |   |
|----------|----------|---------------------------------------------------------------------------------------------------|------|---|
| 14190890 | Ppp1r16b | protein phosphatase 1, regulatory<br>(inhibitor) subunit 16B<br>expressed in non-metastatic cells | 1.41 | 0 |
| 14180612 | Nme3     | 3                                                                                                 | 1.41 | 0 |
| 14183795 | Sulf2    | sulfatase 2                                                                                       | 1.41 | 0 |
| 14188939 | Hba-a1   | hemoglobin alpha, adult chain 1                                                                   | 1.41 | 0 |
|          | IMAGE=56 |                                                                                                   |      |   |
| 14183313 | 78567    |                                                                                                   | 1.41 | 0 |
| 14183811 | Def8     | differentially expressed in FDCP 8                                                                | 1.42 | 0 |
| 14188805 | Atxn1    | ataxin 1                                                                                          | 1.42 | 0 |
| 14192351 | Try4     | trypsin 4                                                                                         | 1.42 | 0 |
|          |          | MAP/microtubule affinity-regulating                                                               |      |   |
| 14180461 | Mark2    | kinase 2                                                                                          | 1.42 | 0 |
| 14191234 | Stx8     | syntaxin 8                                                                                        | 1.42 | 0 |
| 14191453 | Pgf      | placental growth factor                                                                           | 1.42 | 0 |
|          | C030019F |                                                                                                   |      |   |
| 14189418 | 02Rik    | RIKEN cDNA C030019F02 gene                                                                        | 1.42 | 0 |
| 14188625 | Limd2    | LIM domain containing 2<br>adenine phosphoribosyl                                                 | 1.43 | 0 |
| 14179231 | Aprt     | transferase                                                                                       | 1.43 | 0 |
| 14186581 | Gcg      | glucagon                                                                                          | 1.43 | 0 |
|          | 2310040A |                                                                                                   |      |   |
| 14190058 | 07Rik    | RIKEN cDNA 2310040A07 gene                                                                        | 1.43 | 1 |
| 14184520 | Unc84a   | unc-84 homolog A (C. elegans)<br>suppressor of Ty 4 homolog 1 (S.<br>cerevisiae)                  | 1.43 | 0 |
| 14189800 | Supt4h1  |                                                                                                   | 1.43 | 0 |
|          | 2900057K |                                                                                                   |      |   |
| 14182830 | 09Rik    | RIKEN cDNA 2900057K09 gene                                                                        | 1.43 | 0 |
|          | 1200004M |                                                                                                   |      |   |
| 14181014 | 23Rik    | RIKEN cDNA 1200004M23 gene                                                                        | 1.43 | 0 |
|          | A630055G |                                                                                                   |      |   |
| 14186641 | 03Rik    | RIKEN cDNA A630055G03 gene                                                                        | 1.44 | 0 |
| 14185536 | Id3      | inhibitor of DNA binding 3                                                                        | 1.44 | 0 |
| 14181845 | Mirg     | miRNA containing gene<br>hydroxyacyl-Coenzyme A                                                   | 1.44 | 0 |
| 14191697 | Hadh     | dehydrogenase                                                                                     | 1.44 | 0 |
| 14190580 | Sost     | sclerostin                                                                                        | 1.44 | 0 |
|          |          | proteasome (prosome, macropain)                                                                   |      |   |
| 14189942 | Psme1    | 28 subunit, alpha                                                                                 | 1.44 | 0 |
|          | 2010107E |                                                                                                   |      |   |
| 14179176 | 04Rik    | RIKEN cDNA 2010107E04 gene                                                                        | 1.44 | 0 |
| 14188668 | Ccne1    | cyclin E1                                                                                         | 1.44 | 0 |
|          | 2810433D |                                                                                                   |      |   |
| 14182628 | 01Rik    | RIKEN cDNA 2810433D01 gene                                                                        | 1.44 | 0 |
| 14179424 | Fhl2     | four and a half LIM domains 2                                                                     | 1.45 | 0 |
|          | IMAGE=64 |                                                                                                   |      |   |
| 14191791 | 33529    |                                                                                                   | 1.45 | 0 |
| 14180635 | Casp7    | caspase 7                                                                                         | 1.45 | 0 |
| 14184775 | Tbc1d8   | TBC1 domain family, member 8                                                                      | 1.45 | 0 |
|          |          | translocase of outer mitochondrial                                                                |      |   |
| 14178036 | Tomm40   | membrane 40 homolog (yeast)<br>low density lipoprotein receptor-                                  | 1.45 | 0 |
|          |          | related protein 6                                                                                 |      |   |
| 14191580 | Lrp6     | ectonucleotide                                                                                    | 1.45 | 0 |
| 14178130 | Enpp5    | pyrophosphatase/phosphodiesterase                                                                 | 1.46 | 0 |



|          |            | se 5                                |      |   |
|----------|------------|-------------------------------------|------|---|
|          |            | G protein-coupled receptor, family  |      |   |
| 14189995 | Gprc5c     | C, group 5, member C                | 1.46 | 0 |
| 14191942 | Ak1        | adenylate kinase 1                  | 1.46 | 0 |
| 14188270 | Casp6      | caspase 6                           | 1.46 | 0 |
| 14192561 | Cald1      | caldesmon 1                         | 1.46 | 0 |
| 14190219 | Gc         | group specific component            | 1.46 | 0 |
|          | IMAGE=64   |                                     |      |   |
| 14190335 | 35887      |                                     | 1.47 | 0 |
|          |            | solute carrier family 40 (iron-     |      |   |
| 14180611 | Slc40a1    | regulated transporter), member 1    | 1.47 | 0 |
|          |            | interferon induced transmembrane    |      |   |
| 14186421 | Ifitm2     | protein 2                           | 1.47 | 0 |
| 14182049 | Myo9a      | myosin IXa                          | 1.47 | 0 |
| 14187150 | Gpx2       | glutathione peroxidase 2            | 1.47 | 0 |
|          |            | guanine nucleotide binding protein, |      |   |
| 14191044 | Gnao1      | alpha o                             | 1.47 | 0 |
|          |            | ATPase, H+ transporting,            |      |   |
| 14189137 | Atp6v0e    | lysosomal V0 subunit E              | 1.48 | 0 |
| 14185551 | Gata4      | GATA binding protein 4              | 1.48 | 0 |
| 14185788 | Sez6       | seizure related gene 6              | 1.48 | 0 |
|          |            | transmembrane BAX inhibitor motif   |      |   |
| 14184397 | Tmbim4     | containing 4                        | 1.48 | 0 |
| 14184007 | Fhl1       | four and a half LIM domains 1       | 1.48 | 0 |
|          |            | S100 calcium binding protein A6     |      |   |
| 14186851 | S100a6     | (calcyclin)                         | 1.48 | 0 |
|          |            | Rho guanine nucleotide exchange     |      |   |
| 14183638 | Arhgef19   | factor (GEF) 19                     | 1.48 | 0 |
|          | D11Erttd73 | DNA segment, Chr 11, ERATO Doi      |      |   |
| 14184280 | 0e         | 730, expressed                      | 1.49 | 2 |
|          |            | interferon stimulated exonuclease   |      |   |
| 14190209 | Isg20l1    | gene 20-like 1                      | 1.49 | 0 |
|          | IMAGE=64   |                                     |      |   |
| 14181402 | 36423      |                                     | 1.49 | 0 |
| 14178977 | Arrdc3     | arrestin domain containing 3        | 1.49 | 0 |
|          | IMAGE=64   |                                     |      |   |
| 14187749 | 31902      |                                     | 1.49 | 0 |
|          |            | hydroxyacyl-Coenzyme A              |      |   |
|          |            | dehydrogenase; solute carrier       |      |   |
|          |            | family 39 (metal ion transporter),  |      |   |
| 14190425 | Slc39a5    | member 5                            | 1.49 | 0 |
| 14191449 | Nelf       | nasal embryonic LHRH factor         | 1.50 | 0 |
| 14185075 | Casp6      | caspase 6                           | 1.50 | 0 |
| 14187936 | Rdh16      | retinol dehydrogenase 16            | 1.51 | 0 |
|          |            | biogenesis of lysosome-related      |      |   |
| 14192246 | Bloc1s1    | organelles complex-1, subunit 1     | 1.51 | 0 |
| 14188904 | Ccng1      | cyclin G1                           | 1.51 | 0 |
|          | IMAGE=59   |                                     |      |   |
| 14186071 | 39110      |                                     | 1.51 | 0 |
| 14187862 | Pcnx       | pecanex homolog (Drosophila)        | 1.51 | 0 |
| 14179149 | Gcg        | glucagon                            | 1.52 | 0 |
|          |            | cytidine and dCMP deaminase         |      |   |
| 14188786 | Cdadc1     | domain containing 1                 | 1.52 | 0 |
| 14189734 | Mt2        | metallothionein 2                   | 1.52 | 0 |
| 14185739 | IMAGE=64   |                                     | 1.52 | 0 |

|          |                  |                                                                                                                                                                |      |   |
|----------|------------------|----------------------------------------------------------------------------------------------------------------------------------------------------------------|------|---|
|          | 36221            | adenine phosphoribosyl transferase                                                                                                                             | 1.52 | 0 |
| 14185795 | Aprt             |                                                                                                                                                                |      |   |
| 14179765 | Mirg             | miRNA containing gene                                                                                                                                          | 1.52 | 0 |
|          |                  | neural precursor cell expressed, developmentally down-regulated gene 4; similar to neural precursor cell expressed, developmentally down-regulated 4 isoform 2 |      |   |
|          | Nedd4; LOC63939  |                                                                                                                                                                |      |   |
| 14182381 | 6                |                                                                                                                                                                | 1.53 | 0 |
| 14178443 | Id2              | inhibitor of DNA binding 2                                                                                                                                     | 1.53 | 0 |
| 14179493 | Bex1             | brain expressed gene 1                                                                                                                                         | 1.53 | 0 |
|          |                  | solute carrier family 29 (nucleoside transporters), member 1                                                                                                   |      |   |
| 14183000 | Slc29a1          |                                                                                                                                                                | 1.53 | 0 |
| 14191698 | Mirg             | miRNA containing gene                                                                                                                                          | 1.54 | 0 |
| 14177910 | Prdx4            | peroxiredoxin 4                                                                                                                                                | 1.54 | 1 |
|          |                  | solute carrier family 29 (nucleoside transporters), member 1                                                                                                   |      |   |
| 14183645 | Slc29a1          |                                                                                                                                                                | 1.54 | 0 |
|          |                  | NADH dehydrogenase (ubiquinone) 1 alpha subcomplex, 3                                                                                                          |      |   |
| 14189612 | Ndufa3           |                                                                                                                                                                | 1.54 | 0 |
|          | IMAGE=64         |                                                                                                                                                                |      |   |
| 14185719 | 36125            | interferon induced transmembrane protein 2                                                                                                                     | 1.55 | 0 |
| 14192082 | Ifitm2           |                                                                                                                                                                | 1.55 | 0 |
| 14186491 | Ddc              | dopa decarboxylase                                                                                                                                             | 1.56 | 0 |
| 14187963 | Crip2            | cysteine rich protein 2                                                                                                                                        | 1.56 | 0 |
|          | 2410015N         |                                                                                                                                                                |      |   |
| 14186083 | 17Rik            | RIKEN cDNA 2410015N17 gene hydroxyacyl-Coenzyme A dehydrogenase; DEAD (Asp-Glu-Ala-Asp) box polypeptide 23                                                     | 1.56 | 0 |
| 14183693 | Hadh; Ddx23      |                                                                                                                                                                | 1.56 | 0 |
|          | Myo9a; C130068I1 |                                                                                                                                                                |      |   |
| 14180852 | 2Rik             | myosin IXa; RIKEN cDNA C130068I12 gene                                                                                                                         | 1.56 | 0 |
|          |                  | adipose differentiation related protein                                                                                                                        |      |   |
| 14187726 | Adfp             |                                                                                                                                                                | 1.57 | 0 |
|          |                  | dihydrolipoamide S-acetyltransferase (E2 component of pyruvate dehydrogenase complex)                                                                          |      |   |
| 14190060 | Dlat             |                                                                                                                                                                | 1.57 | 0 |
| 14188557 | Litaf            | LPS-induced TN factor                                                                                                                                          | 1.57 | 0 |
| 14179599 | Ttc9c            | tetratricopeptide repeat domain 9C                                                                                                                             | 1.58 | 0 |
| 14191370 | Nanog            | Nanog homeobox                                                                                                                                                 | 1.58 | 0 |
| 14182878 | Lrpprc           | leucine-rich PPR-motif containing guanine nucleotide binding protein (G protein), gamma 5 subunit                                                              | 1.59 | 0 |
| 14186548 | Gng5             |                                                                                                                                                                | 1.60 | 0 |
| 14192352 | Bax              | Bcl2-associated X protein                                                                                                                                      | 1.61 | 0 |
|          |                  | ubiquitin-conjugating enzyme E2D 3 (UBC4/5 homolog, yeast)                                                                                                     |      |   |
| 14178879 | Ube2d3           |                                                                                                                                                                | 1.61 | 0 |
| 14179691 | Ddc              | dopa decarboxylase                                                                                                                                             | 1.62 | 0 |
| 14190522 | Mt2              | metallothionein 2                                                                                                                                              | 1.62 | 0 |
|          |                  | serine (or cysteine) peptidase inhibitor, clade A, member 1c                                                                                                   |      |   |
| 14184921 | Serpina1c        |                                                                                                                                                                | 1.64 | 0 |
| 14192234 | Tspan8           | tetraspanin 8                                                                                                                                                  | 1.68 | 0 |
| 14180630 | Nqo1             | NAD(P)H dehydrogenase, quinone                                                                                                                                 | 1.69 | 0 |

|          |           |                                                                                           |      |   |
|----------|-----------|-------------------------------------------------------------------------------------------|------|---|
| 14180042 |           | GENBANK=CF622970                                                                          | 1.70 | 0 |
| 14185326 | Pgam1     | phosphoglycerate mutase 1                                                                 | 1.73 | 0 |
| 14185312 | Litaf     | LPS-induced TN factor                                                                     | 1.78 | 0 |
| 14178519 | Nr4a1     | nuclear receptor subfamily 4,<br>group A, member 1                                        | 1.83 | 0 |
| 14187439 | Fcgbp     | Fc fragment of IgG binding protein                                                        | 1.83 | 0 |
| 14181544 | Id2       | inhibitor of DNA binding 2                                                                | 1.84 | 0 |
| 14192209 | Ppy       | pancreatic polypeptide                                                                    | 1.87 | 0 |
| 14188850 | Caskin2   | cask-interacting protein 2                                                                | 1.87 | 0 |
| 14189191 | Serpina1c | serine (or cysteine) peptidase<br>inhibitor, clade A, member 1c                           | 1.88 | 0 |
| 14183027 | Cd9       | CD9 antigen                                                                               | 1.90 | 0 |
| 14188317 | Id1       | inhibitor of DNA binding 1                                                                | 1.91 | 0 |
| 14184078 | Id1       | inhibitor of DNA binding 1                                                                | 2.12 | 0 |
| 14189600 | Trp53inp1 | transformation related protein 53<br>inducible nuclear protein 1<br>heterogeneous nuclear | 2.27 | 0 |
| 14184361 | Hnrpm     | ribonucleoprotein M                                                                       | 2.40 | 0 |
| 14185290 | Plk2      | polo-like kinase 2 (Drosophila)                                                           | 2.50 | 0 |
| 14188851 | Cdkn1a    | cyclin-dependent kinase inhibitor<br>1A (P21)                                             | 2.87 | 0 |
