# Supplementary material
Source: PubMed Central journal article supplement (PMC2776433)
Supplement: 0904849106_ST2_PDF.pdf [file 0904849106_ST2_PDF.pdf]

**Table S2: Pdx1 ChIP on chip data of global Pdx1 occupancy in Min6 cells (Mouse PromoterChip BCBC-5A platform)**

| <b>ELEMENT_ID</b> | <b>NAME</b>                            | <b>SYMBOL</b> | <b>FC</b> | <b>FDR</b> |
|-------------------|----------------------------------------|---------------|-----------|------------|
| 14116640          | P206611 Akr1e1 ProximalPromoter        | Akr1e1        | 6.355     | 0          |
| 14115425          | P210248 Clstn3 ProximalPromoter        | Clstn3        | 5.567     | 0          |
| 14125508          | P209400 Vrk3 ProximalPromoter          | Vrk3          | 4.884     | 0          |
| 14115718          | P203317 Wdr23 ProximalPromoter         | Wdr23         | 4.665     | 0          |
| 14111984          | P202638 Dcps ProximalPromoter          | Dcps          | 4.211     | 0          |
| 14119314          | P100290 Ins1 ProximalPromoter          | Ins1          | 4.087     | 0          |
| 14122256          | P100933 Pkm2 ProximalPromoter          | Pkm2          | 3.959     | 0.35       |
| 14128311          | P203239 Rnf4 ProximalPromoter          | Rnf4          | 3.848     | 0.46       |
| 14123808          | P210809 Leprot ProximalPromoter        | Leprot        | 3.811     | 0          |
| 14114117          | P204894 Rfx1 ProximalPromoter          | Rfx1          | 3.755     | 0.35       |
| 14117568          | P209975 8430408G22Rik ProximalPromoter | 8430408G22Rik | 3.724     | 0          |
| 14117460          | P204920 Scd2 ProximalPromoter          | Scd2          | 3.61      | 0.5        |
| 14120795          | P205194 Atf4 ProximalPromoter          | Atf4          | 3.583     | 0          |
| 14126239          | P205078 Tpp2 ProximalPromoter          | Tpp2          | 3.555     | 0          |
| 14126222          | P204576 Ins1 ProximalPromoter          | Ins1          | 3.553     | 0          |
| 14129516          | P203022 Hnrpl ProximalPromoter         | Hnrpl         | 3.506     | 0          |
| 14122230          | P100543 Pdcd10 ProximalPromoter        | Pdcd10        | 3.477     | 1.2        |
| 14120915          | P209132 Fbxw7 ProximalPromoter         | Fbxw7         | 3.413     | 0          |
| 14121145          | P207085 4930511A21Rik ProximalPromoter | 4930511A21Rik | 3.394     | 0          |
| 14110830          | P209293 Tmem97 ProximalPromoter        | Tmem97        | 3.347     | 0          |
| 14120341          | P201351 Calu ProximalPromoter          | Calu          | 3.336     | 0.57       |
| 14119907          | P201683 Hnrpul1 ProximalPromoter       | Hnrpul1       | 3.297     | 0          |
| 14119866          | P201801 lft122 ProximalPromoter        | lft122        | 3.267     | 0          |
| 14114238          | P207507 Ccdc28b ProximalPromoter       | Ccdc28b       | 3.263     | 0          |
| 14113721          | P206550 Polg ProximalPromoter          | Polg          | 3.258     | 0          |
| 14113654          | P201325 Zfp672 ProximalPromoter        | Zfp672        | 3.202     | 0.35       |
| 14112530          | P209542 Mvd ProximalPromoter           | Mvd           | 3.198     | 1.2        |
| 14115482          | P210369 Rnf40 ProximalPromoter         | Rnf40         | 3.169     | 0.35       |
| 14110162          | P103341 Tomm40 ProximalPromoter        | Tomm40        | 3.134     | 0          |
| 14124644          | P210797 Tmem11 ProximalPromoter        | Tmem11        | 3.108     | 0          |
| 14125078          | P208798 Sp2 ProximalPromoter           | Sp2           | 3.104     | 0          |
| 14121603          | P203964 Zfp687 ProximalPromoter        | Zfp687        | 3.089     | 0          |
| 14114799          | P104692 Idh1 DistalPromoter            | Idh1          | 3.069     | 0          |
| 14120847          | P201157 St18 ProximalPromoter          | St18          | 3.061     | 0          |
| 14112805          | P201972 Lrrc48 ProximalPromoter        | Lrrc48        | 3.019     | 0          |
| 14126266          | P202925 Kctd7 ProximalPromoter         | Kctd7         | 3.004     | 0          |
| 14124360          | P102181 Calu ProximalPromoter          | Calu          | 2.99      | 0.57       |
| 14119059          | P203390 Rabl4 ProximalPromoter         | Rabl4         | 2.986     | 0          |

|          |                                                          |               |       |      |
|----------|----------------------------------------------------------|---------------|-------|------|
| 14129839 | P103598 Stk25 ProximalPromoter<br>P202535 Arhgap12       | Stk25         | 2.973 | 0.5  |
| 14113308 | ProximalPromoter                                         | Arhgap12      | 2.965 | 1.55 |
| 14120739 | P203684 Stk40 ProximalPromoter                           | Stk40         | 2.953 | 0    |
| 14122576 | P208378 Ddx54 ProximalPromoter<br>P210578 D330028D13Rik  | Ddx54         | 2.951 | 0    |
| 14123013 | ProximalPromoter                                         | D330028D13Rik | 2.92  | 0    |
| 14114199 | P209519 Nme7 ProximalPromoter<br>P209368 2900010J23Rik   | Nme7          | 2.916 | 0.35 |
| 14118787 | ProximalPromoter                                         | 2900010J23Rik | 2.912 | 0.35 |
| 14126172 | P203021 Hsd12 ProximalPromoter<br>P201236 A530088I07Rik  | Hsd12         | 2.898 | 0.35 |
| 14119172 | ProximalPromoter                                         | A530088I07Rik | 2.896 | 0    |
| 14112486 | P201185 Eny2 ProximalPromoter<br>P209510 6430706D22Rik   | Eny2          | 2.884 | 1.2  |
| 14128411 | ProximalPromoter<br>P209807 AV249152                     | 6430706D22Rik | 2.884 | 1.02 |
| 14128839 | ProximalPromoter<br>P101047 Hsp90b1                      | AV249152      | 2.882 | 0    |
| 14120169 | ProximalPromoter                                         | Hsp90b1       | 2.876 | 0    |
| 14129566 | P204577 Ins2 ProximalPromoter                            | Ins2          | 2.866 | 0.35 |
| 14114956 | P204815 Ppgb ProximalPromoter<br>P208603 1110008J03Rik   | Ppgb          | 2.866 | 0.8  |
| 14130080 | ProximalPromoter                                         | 1110008J03Rik | 2.864 | 0.35 |
| 14122498 | P206479 Wbp2 ProximalPromoter<br>P203187 Pcdhgc3         | Wbp2          | 2.84  | 0.35 |
| 14116159 | ProximalPromoter<br>P207141 Map3k11                      | Pcdhgc3       | 2.832 | 0.35 |
| 14125483 | ProximalPromoter                                         | Map3k11       | 2.828 | 0    |
| 14115406 | P200648 ProximalPromoter<br>P102088 Gabarapl2            |               | 2.823 | 1.71 |
| 14113077 | ProximalPromoter                                         | Gabarapl2     | 2.819 | 0    |
| 14125077 | P208822 Mynn ProximalPromoter                            | Mynn          | 2.803 | 0    |
| 14116810 | P101790 Leng4 ProximalPromoter                           | Leng4         | 2.742 | 0.5  |
| 14128789 | P200869 Thnsl1 ProximalPromoter<br>P201537 A330008L17Rik | Thnsl1        | 2.74  | 1.71 |
| 14114479 | ProximalPromoter                                         | A330008L17Rik | 2.717 | 4.2  |
| 14123509 | P101054 Trp53 ProximalPromoter<br>P200603 5730437N04Rik  | Trp53         | 2.691 | 0    |
| 14112060 | ProximalPromoter<br>P209761 Abhd11                       | 5730437N04Rik | 2.676 | 0.35 |
| 14115461 | ProximalPromoter                                         | Abhd11        | 2.665 | 1.2  |
| 14113395 | P207367 Ormdl2 ProximalPromoter                          | Ormdl2        | 2.665 | 2.67 |
| 14128950 | P102482 lpf1 ProximalPromoter<br>P200355 2810417H13Rik   | lpf1          | 2.663 | 9.95 |
| 14112510 | ProximalPromoter                                         | 2810417H13Rik | 2.659 | 0.35 |
| 14127708 | P102176 C1qa ProximalPromoter                            | C1qa          | 2.641 | 0.35 |
| 14128432 | P207589 Zwint ProximalPromoter                           | Zwint         | 2.617 | 0.57 |
| 14127057 | P204517 Hes3 ProximalPromoter                            | Hes3          | 2.617 | 0    |
| 14116259 | P210285 Gnn ProximalPromoter                             | Gnn           | 2.617 | 1.55 |
| 14125881 | P200389 Tial1 ProximalPromoter<br>P210590 Ccdc95         | Tial1         | 2.604 | 1.55 |
| 14118833 | ProximalPromoter<br>P206349 Timm10                       | Ccdc95        | 2.578 | 1.02 |
| 14118315 | ProximalPromoter                                         | Timm10        | 2.554 | 0.35 |

|          |                                           |               |       |      |
|----------|-------------------------------------------|---------------|-------|------|
| 14123778 | P206097 Slc27a1<br>ProximalPromoter       | Slc27a1       | 2.547 | 0.8  |
| 14114483 | P201531 Scyl1bp1<br>ProximalPromoter      | Scyl1bp1      | 2.533 | 2.14 |
| 14116721 | P208436 2700097O09Rik<br>ProximalPromoter | 2700097O09Rik | 2.533 | 1.02 |
| 14125438 | P200651 Tspyl2 ProximalPromoter           | Tspyl2        | 2.53  | 0    |
| 14124523 | P201292 Il4ra ProximalPromoter            | Il4ra         | 2.528 | 0.57 |
| 14116697 | P207705 Ppp1r10<br>ProximalPromoter       | Ppp1r10       | 2.525 | 2.14 |
| 14127977 | P200225 0610009B22Rik<br>ProximalPromoter | 0610009B22Rik | 2.523 | 0    |
| 14117482 | P206379 Hspa14<br>ProximalPromoter        | Hspa14        | 2.521 | 1.71 |
| 14125081 | P207666 Etfdh ProximalPromoter            | Etfdh         | 2.519 | 0.5  |
| 14121608 | P202490 Ccpg1 ProximalPromoter            | Ccpg1         | 2.514 | 1.02 |
| 14116607 | P203725 R3hdm1<br>ProximalPromoter        | R3hdm1        | 2.498 | 0.94 |
| 14114135 | P206360 Schip1 ProximalPromoter           | Schip1        | 2.483 | 1.71 |
| 14112508 | P200313 2610510J17Rik<br>ProximalPromoter | 2610510J17Rik | 2.455 | 1.55 |
| 14116743 | P207277 Mesdc2<br>ProximalPromoter        | Mesdc2        | 2.433 | 6.23 |
| 14114460 | P207008 Sh3kbp1<br>ProximalPromoter       | Sh3kbp1       | 2.43  | 3.35 |
| 14113348 | P200294 Ppp1r7 ProximalPromoter           | Ppp1r7        | 2.413 | 8.4  |
| 14115480 | P208079 Gstm4 ProximalPromoter            | Gstm4         | 2.41  | 1.55 |
| 14122403 | P203391 Rab30 ProximalPromoter            | Rab30         | 2.408 | 0    |
| 14119959 | P201392 0610013E23Rik<br>ProximalPromoter | 0610013E23Rik | 2.402 | 1.55 |
| 14127127 | P207872 Narf ProximalPromoter             | Narf          | 2.387 | 0.5  |
| 14116314 | P208115 1500011H22Rik<br>ProximalPromoter | 1500011H22Rik | 2.385 | 0.5  |
| 14116306 | P207398 Hagh ProximalPromoter             | Hagh          | 2.383 | 2.67 |
| 14127213 | P210732 Mon1b ProximalPromoter            | Mon1b         | 2.382 | 0    |
| 14123764 | P200511 Lims1 ProximalPromoter            | Lims1         | 2.373 | 0.5  |
| 14127470 | P204439 Galr1 ProximalPromoter            | Galr1         | 2.37  | 0.8  |
| 14126724 | P200298 Mad2l2 ProximalPromoter           | Mad2l2        | 2.347 | 4.2  |
| 14122645 | P100705 Cct3 ProximalPromoter             | Cct3          | 2.346 | 0    |
| 14128075 | P100797 Got1 ProximalPromoter             | Got1          | 2.328 | 1.2  |
| 14117925 | P206107 Cops4 ProximalPromoter            | Cops4         | 2.328 | 1.2  |
| 14125583 | P100136 Dapk3 ProximalPromoter            | Dapk3         | 2.326 | 0.8  |
| 14122474 | P205364 Eif2b4 ProximalPromoter           | Eif2b4        | 2.326 | 1.02 |
| 14129602 | P206721 Gosr2 ProximalPromoter            | Gosr2         | 2.325 | 1.71 |
| 14129427 | P104750 Pkm2 DistalPromoter               | Pkm2          | 2.321 | 0.5  |
| 14118798 | P210177 Tom1l2 ProximalPromoter           | Tom1l2        | 2.32  | 0.35 |
| 14114182 | P200453 ProximalPromoter                  |               | 2.317 | 0    |
| 14116639 | P206635 Rnf5 ProximalPromoter             | Rnf5          | 2.312 | 1.71 |
| 14111295 | P207952 Cs ProximalPromoter               | Cs            | 2.309 | 0.94 |
| 14128285 | P205178 Ap3b1 ProximalPromoter            | Ap3b1         | 2.305 | 8.4  |
| 14119730 | P100146 Ddx5 ProximalPromoter             | Ddx5          | 2.289 | 3.35 |
| 14124484 | P202732 Utx ProximalPromoter              | Utx           | 2.285 | 6.23 |
| 14130058 | P208507 Prcp ProximalPromoter             | Prcp          | 2.285 | 4.73 |
| 14121667 | P206840 Cript ProximalPromoter            | Cript         | 2.283 | 1.2  |
| 14122819 | P205959 Ubb ProximalPromoter              | Ubb           | 2.282 | 1.02 |

|          |                                                          |               |       |      |
|----------|----------------------------------------------------------|---------------|-------|------|
| 14129579 | P205085 Rpl13a ProximalPromoter<br>P102466 Pafah1b2      | Rpl13a        | 2.267 | 3.35 |
| 14116410 | ProximalPromoter                                         | Pafah1b2      | 2.264 | 5.28 |
| 14122548 | P207743 Mis12 ProximalPromoter                           | Mis12         | 2.263 | 6.23 |
| 14126487 | P103981 Pde6c ProximalPromoter                           | Pde6c         | 2.256 | 5.28 |
| 14124584 | P206572 Eif3s7 ProximalPromoter                          | Eif3s7        | 2.255 | 1.55 |
| 14127552 | P209250 Mutyh ProximalPromoter<br>P209699 D430028G21Rik  | Mutyh         | 2.253 | 1.02 |
| 14128407 | ProximalPromoter                                         | D430028G21Rik | 2.253 | 0.8  |
| 14117575 | P209125 Dpf3 ProximalPromoter<br>P202468 2700049P18Rik   | Dpf3          | 2.252 | 0    |
| 14128297 | ProximalPromoter                                         | 2700049P18Rik | 2.25  | 0    |
| 14126159 | P203136 Tbl2 ProximalPromoter                            | Tbl2          | 2.245 | 0.35 |
| 14122641 | P101083 Zfp207 ProximalPromoter                          | Zfp207        | 2.242 | 0    |
| 14118760 | P200794 Ptrh2 ProximalPromoter<br>P208786 4632404H22Rik  | Ptrh2         | 2.238 | 4.2  |
| 14127587 | ProximalPromoter                                         | 4632404H22Rik | 2.236 | 8.4  |
| 14120940 | P209836 Setd4 ProximalPromoter                           | Setd4         | 2.236 | 0.57 |
| 14129564 | P204625 Ldhd ProximalPromoter                            | Ldhd          | 2.235 | 0    |
| 14112260 | P102861 Cbx5 ProximalPromoter                            | Cbx5          | 2.231 | 0.35 |
| 14113670 | P203852 Cpt1a ProximalPromoter<br>P209367 Nusap1         | Cpt1a         | 2.225 | 0    |
| 14115443 | ProximalPromoter                                         | Nusap1        | 2.218 | 5.28 |
| 14111839 | P103407 Rnf5 ProximalPromoter<br>P102330 Hdgfrp2         | Rnf5          | 2.215 | 4.2  |
| 14120596 | ProximalPromoter                                         | Hdgfrp2       | 2.215 | 0    |
| 14122160 | P207455 Uqcrq ProximalPromoter                           | Uqcrq         | 2.213 | 2.67 |
| 14125050 | P200443 Mesc2 ProximalPromoter                           | Mesc2         | 2.21  | 3.35 |
| 14123315 | P205620 Mecp2 ProximalPromoter<br>P207892 2310003F16Rik  | Mecp2         | 2.205 | 0.5  |
| 14113768 | ProximalPromoter                                         | 2310003F16Rik | 2.202 | 6.23 |
| 14114156 | P201137 Zcchc7 ProximalPromoter                          | Zcchc7        | 2.202 | 0    |
| 14123794 | P200218 Exosc5 ProximalPromoter<br>P207251 4733401H18Rik | Exosc5        | 2.201 | 0    |
| 14130124 | ProximalPromoter                                         | 4733401H18Rik | 2.199 | 4.2  |
| 14120500 | P200022 Papd1 ProximalPromoter                           | Papd1         | 2.199 | 0    |
| 14120220 | P104106 Insig1 ProximalPromoter<br>P210773 Dcun1d3       | Insig1        | 2.198 | 1.55 |
| 14124699 | ProximalPromoter                                         | Dcun1d3       | 2.198 | 2.67 |
| 14120378 | P201285 Tnfaip1 ProximalPromoter                         | Tnfaip1       | 2.193 | 7.17 |
| 14117818 | P202053 Syt1 ProximalPromoter                            | Syt1          | 2.192 | 0.46 |
| 14120774 | P202454 Dbt ProximalPromoter                             | Dbt           | 2.189 | 0    |
| 14112216 | P101314 Mcrs1 ProximalPromoter<br>P200033 Timm17a        | Mcrs1         | 2.186 | 3.35 |
| 14117991 | ProximalPromoter                                         | Timm17a       | 2.184 | 0.94 |
| 14118237 | P201925 F8a ProximalPromoter<br>P209372 D4Wsu114e        | F8a           | 2.178 | 1.71 |
| 14112095 | ProximalPromoter                                         | D4Wsu114e     | 2.175 | 2.14 |
| 14111608 | P204906 Polr2a ProximalPromoter                          | Polr2a        | 2.173 | 0.35 |
| 14120773 | P202478 Tceal8 ProximalPromoter                          | Tceal8        | 2.17  | 0.94 |
| 14113674 | P205264 Cdc45l ProximalPromoter                          | Cdc45l        | 2.169 | 0    |
| 14116765 | P209019 Nolc1 ProximalPromoter                           | Nolc1         | 2.167 | 6.23 |
| 14125635 | P102889 Igfbp4 ProximalPromoter                          | Igfbp4        | 2.16  | 1.2  |
| 14118295 | P204932 Sdf2 ProximalPromoter                            | Sdf2          | 2.16  | 1.55 |

|          |                                  |               |       |      |
|----------|----------------------------------|---------------|-------|------|
| 14128931 | P101721 Mcam ProximalPromoter    | Mcam          | 2.158 | 8.4  |
|          | P210088 BC025546                 |               |       |      |
| 14130137 | ProximalPromoter                 | BC025546      | 2.158 | 1.2  |
|          | P100275 Hsp90ab1                 |               |       |      |
| 14127667 | ProximalPromoter                 | Hsp90ab1      | 2.148 | 1.02 |
| 14127924 | P206080 Decr2 ProximalPromoter   | Decr2         | 2.147 | 0    |
| 14126229 | P202660 Kbtbd3 ProximalPromoter  | Kbtbd3        | 2.147 | 3.35 |
| 14129271 | P209030 ProximalPromoter         |               | 2.145 | 1.02 |
| 14122449 | P205675 Nfya ProximalPromoter    | Nfya          | 2.142 | 2.14 |
| 14125845 | P202624 Skiv2l2 ProximalPromoter | Skiv2l2       | 2.136 | 5.28 |
| 14125400 | P205072 Top3a ProximalPromoter   | Top3a         | 2.135 | 2.67 |
|          | P209874 BC020077                 |               |       |      |
| 14128462 | ProximalPromoter                 | BC020077      | 2.132 | 0.5  |
| 14127742 | P104054 BlvrB ProximalPromoter   | BlvrB         | 2.132 | 2.14 |
|          | P203223 AI317395                 |               |       |      |
| 14114100 | ProximalPromoter                 | AI317395      | 2.13  | 0    |
| 14113041 | P100168 Ell ProximalPromoter     | Ell           | 2.126 | 1.71 |
| 14126639 | P203728 Gamt ProximalPromoter    | Gamt          | 2.121 | 1.2  |
|          | P207477 Chchd5                   |               |       |      |
| 14115471 | ProximalPromoter                 | Chchd5        | 2.117 | 1.71 |
| 14110858 | P209445 Cbll1 ProximalPromoter   | Cbll1         | 2.116 | 3.35 |
| 14114586 | P210595 ProximalPromoter         |               | 2.116 | 0.46 |
|          | P207701 Txndc14                  |               |       |      |
| 14122546 | ProximalPromoter                 | Txndc14       | 2.114 | 0    |
| 14117935 | P207851 Mfap1 ProximalPromoter   | Mfap1         | 2.114 | 1.2  |
|          | P101850 1110001A07Rik            |               |       |      |
| 14119319 | ProximalPromoter                 | 1110001A07Rik | 2.111 | 0.57 |
| 14110696 | P203469 Chtf18 ProximalPromoter  | Chtf18        | 2.111 | 6.23 |
| 14119562 | P206227 Pax6 ProximalPromoter    | Pax6          | 2.11  | 2.67 |
| 14110796 | P206328 Vps45 ProximalPromoter   | Vps45         | 2.105 | 1.02 |
| 14125932 | P207365 Alg14 ProximalPromoter   | Alg14         | 2.104 | 0.5  |
|          | P207858 Gramd3                   |               |       |      |
| 14121275 | ProximalPromoter                 | Gramd3        | 2.104 | 0    |
| 14112452 | P205598 M6pr ProximalPromoter    | M6pr          | 2.098 | 0.94 |
| 14125697 | P107164 Efna1 DistalPromoter     | Efna1         | 2.094 | 4.2  |
| 14112545 | P208441 Neil1 ProximalPromoter   | Neil1         | 2.094 | 4.2  |
| 14112066 | P200846 Abt1 ProximalPromoter    | Abt1          | 2.092 | 3.35 |
|          | P209566 Hexim1                   |               |       |      |
| 14112529 | ProximalPromoter                 | Hexim1        | 2.088 | 0.35 |
| 14127053 | P205286 Cxcr4 ProximalPromoter   | Cxcr4         | 2.088 | 1.71 |
| 14119889 | P202169 Gcg ProximalPromoter     | Gcg           | 2.086 | 0.8  |
|          | P106364 5730536A07Rik            |               |       |      |
| 14117371 | DistalPromoter                   | 5730536A07Rik | 2.086 | 1.71 |
| 14114640 | P207928 Bxdc2 ProximalPromoter   | Bxdc2         | 2.085 | 7.17 |
| 14127832 | P202727 Mgea6 ProximalPromoter   | Mgea6         | 2.083 | 0.46 |
| 14125084 | P207594 ProximalPromoter         |               | 2.082 | 4.2  |
| 14124183 | P202425 Rai17 ProximalPromoter   | Rai17         | 2.082 | 1.02 |
|          | P202986 Akap12                   |               |       |      |
| 14128772 | ProximalPromoter                 | Akap12        | 2.082 | 0.5  |
| 14124789 | P103495 Acss2 ProximalPromoter   | Acss2         | 2.079 | 4.2  |
| 14112504 | P208465 Calr3 ProximalPromoter   | Calr3         | 2.075 | 0    |
|          | P200668 2900073H19Rik            |               |       |      |
| 14122925 | ProximalPromoter                 | 2900073H19Rik | 2.075 | 0.5  |
|          | P208331 1200003M09Rik            |               |       |      |
| 14125910 | ProximalPromoter                 | 1200003M09Rik | 2.073 | 1.02 |

|          |                                 |               |       |      |
|----------|---------------------------------|---------------|-------|------|
| 14112255 | P103263 Gcat ProximalPromoter   | Gcat          | 2.072 | 1.02 |
| 14115605 | P102838 Gna13 ProximalPromoter  | Gna13         | 2.071 | 3.35 |
| 14120405 | P206559 Copg ProximalPromoter   | Copg          | 2.069 | 0    |
|          | P209823 Oxnad1                  |               |       |      |
| 14118432 | ProximalPromoter                | Oxnad1        | 2.068 | 2.14 |
| 14111413 | P103491 Tmeff2 ProximalPromoter | Tmeff2        | 2.066 | 7.17 |
| 14116681 | P208527 Syvn1 ProximalPromoter  | Syvn1         | 2.065 | 2.14 |
| 14115217 | P104800 Sec61g DistalPromoter   | Sec61g        | 2.063 | 3.35 |
| 14121917 | P106727 Grn DistalPromoter      | Grn           | 2.062 | 1.71 |
|          | P204043 Cybasc3                 |               |       |      |
| 14119518 | ProximalPromoter                | Cybasc3       | 2.062 | 0    |
|          | P210098 Tmem32                  |               |       |      |
| 14122613 | ProximalPromoter                | Tmem32        | 2.062 | 5.28 |
|          | P210258 B130050I23Rik           |               |       |      |
| 14129640 | ProximalPromoter                | B130050I23Rik | 2.058 | 0.5  |
| 14121320 | P208027 Cdipt ProximalPromoter  | Cdipt         | 2.058 | 1.71 |
| 14114408 | P104962 DistalPromoter          |               | 2.056 | 6.23 |
| 14122468 | P201381 Wdr37 ProximalPromoter  | Wdr37         | 2.055 | 6.23 |
| 14124779 | P101954 Vps28 ProximalPromoter  | Vps28         | 2.053 | 3.35 |
| 14120988 | P101737 Ppp1r7 ProximalPromoter | Ppp1r7        | 2.051 | 8.4  |
|          | P202302 Aldh5a1                 |               |       |      |
| 14114066 | ProximalPromoter                | Aldh5a1       | 2.051 | 1.02 |
|          | P208983 Pcdhgc4                 |               |       |      |
| 14119275 | ProximalPromoter                | Pcdhgc4       | 2.043 | 1.02 |
| 14113356 | P208604 Armet ProximalPromoter  | Armet         | 2.035 | 7.17 |
| 14112381 | P201742 Cryl1 ProximalPromoter  | Cryl1         | 2.034 | 4.73 |
| 14119645 | P209744 Pitrm1 ProximalPromoter | Pitrm1        | 2.034 | 5.28 |
| 14124675 | P209163 Baalc ProximalPromoter  | Baalc         | 2.031 | 0.35 |
| 14117658 | P101016 Sptlc2 ProximalPromoter | Sptlc2        | 2.031 | 1.55 |
|          | P209363 G431001I09Rik           |               |       |      |
| 14122963 | ProximalPromoter                | G431001I09Rik | 2.031 | 0.5  |
|          | P207422 X83328                  |               |       |      |
| 14116305 | ProximalPromoter                | X83328        | 2.029 | 5.28 |
| 14116027 | P103012 Prkdc ProximalPromoter  | Prkdc         | 2.022 | 4.2  |
| 14116605 | P203773 Aph1c ProximalPromoter  | Aph1c         | 2.018 | 6.23 |
| 14115299 | P205963 Ufd1l ProximalPromoter  | Ufd1l         | 2.014 | 0.57 |
|          | P103791 2610040C18Rik           |               |       |      |
| 14111831 | ProximalPromoter                | 2610040C18Rik | 2.014 | 1.02 |
| 14120522 | P210712 Alkbh5 ProximalPromoter | Alkbh5        | 2.014 | 0    |
| 14114315 | P100991 Dhrr3 ProximalPromoter  | Dhrr3         | 2.011 | 6.23 |
|          | P208327 1200006F02Rik           |               |       |      |
| 14112534 | ProximalPromoter                | 1200006F02Rik | 2.01  | 0    |
|          | P200698 AI413782                |               |       |      |
| 14119170 | ProximalPromoter                | AI413782      | 2.008 | 4.2  |
|          | P206722 Hsd17b12                |               |       |      |
| 14112050 | ProximalPromoter                | Hsd17b12      | 2.008 | 2.67 |
| 14125769 | P206211 Msh5 ProximalPromoter   | Msh5          | 2.007 | 0.94 |
| 14113424 | P208945 ProximalPromoter        |               | 2.006 | 1.71 |
| 14119332 | P101064 Ufd1l ProximalPromoter  | Ufd1l         | 2.004 | 0.35 |
|          | P100142 Gadd45a                 |               |       |      |
| 14125579 | ProximalPromoter                | Gadd45a       | 2.004 | 1.55 |
| 14116703 | P208623 Spp2 ProximalPromoter   | Spp2          | 2.001 | 1.71 |
|          | P206602 Smarcal1                |               |       |      |
| 14123751 | ProximalPromoter                | Smarcal1      | 2     | 4.73 |
| 14121224 | P205443 Gng4 ProximalPromoter   | Gng4          | 1.994 | 0.8  |

|          |                                           |               |       |      |
|----------|-------------------------------------------|---------------|-------|------|
| 14125212 | P103393 Ap3m1 ProximalPromoter            | Ap3m1         | 1.993 | 0.94 |
| 14124625 | P207804 Dedd2 ProximalPromoter            | Dedd2         | 1.99  | 2.67 |
| 14126358 | P210555 B230312A22Rik<br>ProximalPromoter | B230312A22Rik | 1.989 | 1.71 |
| 14119992 | P206417 Chek2 ProximalPromoter            | Chek2         | 1.985 | 2.14 |
| 14111969 | P201984 C030016D13Rik<br>ProximalPromoter | C030016D13Rik | 1.982 | 6.23 |
| 14121694 | P209290 Fbxl15 ProximalPromoter           | Fbxl15        | 1.982 | 0    |
| 14119714 | P100914 Ntan1 ProximalPromoter            | Ntan1         | 1.982 | 0    |
| 14114286 | P100583 Tial1 ProximalPromoter            | Tial1         | 1.978 | 1.71 |
| 14117895 | P206594 Eef1b2 ProximalPromoter           | Eef1b2        | 1.977 | 9.95 |
| 14129968 | P205695 Oprs1 ProximalPromoter            | Oprs1         | 1.971 | 1.71 |
| 14126525 | P107327 Per1 DistalPromoter               | Per1          | 1.97  | 5.28 |
| 14127063 | P201359 Cpt1c ProximalPromoter            | Cpt1c         | 1.967 | 8.4  |
| 14126730 | P207684 Bzw2 ProximalPromoter             | Bzw2          | 1.966 | 0.35 |
| 14112540 | P208273 4632415L05Rik<br>ProximalPromoter | 4632415L05Rik | 1.966 | 0.46 |
| 14123835 | P207968 Atad1 ProximalPromoter            | Atad1         | 1.966 | 0.46 |
| 14117467 | P204846 ProximalPromoter                  |               | 1.964 | 0.35 |
| 14112137 | P210393 Nup88 ProximalPromoter            | Nup88         | 1.963 | 0    |
| 14120437 | P210633 Pigz ProximalPromoter             | Pigz          | 1.962 | 7.17 |
| 14128348 | P206327 Uxt ProximalPromoter              | Uxt           | 1.96  | 0.35 |
| 14123506 | P101408 Smarcal1<br>ProximalPromoter      | Smarcal1      | 1.959 | 5.28 |
| 14120977 | P100603 Rpl13a ProximalPromoter           | Rpl13a        | 1.957 | 4.73 |
| 14116545 | P202168 Zc3h6 ProximalPromoter            | Zc3h6         | 1.956 | 7.17 |
| 14128800 | P210277 AW049829<br>ProximalPromoter      | AW049829      | 1.949 | 4.2  |
| 14116416 | P102412 Ldhd ProximalPromoter             | Ldhd          | 1.949 | 0.35 |
| 14113221 | P201724 Slc4a10<br>ProximalPromoter       | Slc4a10       | 1.948 | 0    |
| 14118747 | P200630 Blcap ProximalPromoter            | Blcap         | 1.945 | 8.4  |
| 14118667 | P203200 Adar ProximalPromoter             | Adar          | 1.945 | 0.5  |
| 14116223 | P206790 Kcnp3 ProximalPromoter            | Kcnp3         | 1.941 | 2.14 |
| 14118922 | P102473 Pde6d ProximalPromoter            | Pde6d         | 1.94  | 4.73 |
| 14125185 | P101144 Cops4 ProximalPromoter            | Cops4         | 1.936 | 0.46 |
| 14122612 | P210030 Cbwd1 ProximalPromoter            | Cbwd1         | 1.936 | 0.94 |
| 14119653 | P207417 Sh3bp5l<br>ProximalPromoter       | Sh3bp5l       | 1.936 | 0.35 |
| 14117778 | P203501 Plekhg6<br>ProximalPromoter       | Plekhg6       | 1.935 | 4.2  |
| 14119074 | P201714 E230015B07Rik<br>ProximalPromoter | E230015B07Rik | 1.933 | 0    |
| 14128725 | P204995 Pdcd10<br>ProximalPromoter        | Pdcd10        | 1.929 | 3.35 |
| 14125087 | P207612 Ogfod2 ProximalPromoter           | Ogfod2        | 1.929 | 1.2  |
| 14115793 | P205581 Limk1 ProximalPromoter            | Limk1         | 1.928 | 1.2  |
| 14113056 | P101296 Mpp2 ProximalPromoter             | Mpp2          | 1.928 | 0    |
| 14110413 | P207812 Srpr ProximalPromoter             | Srpr          | 1.928 | 2.67 |
| 14113669 | P203876 Rhoq ProximalPromoter             | Rhoq          | 1.923 | 0.94 |
| 14114253 | P209900 Tmem34<br>ProximalPromoter        | Tmem34        | 1.923 | 1.55 |
| 14120356 | P203812 Paics ProximalPromoter            | Paics         | 1.921 | 0.5  |
| 14114977 | P206887 Sphk2 ProximalPromoter            | Sphk2         | 1.917 | 7.17 |

|          |                                                          |               |       |      |
|----------|----------------------------------------------------------|---------------|-------|------|
| 14126354 | P210354 Zcsl2 ProximalPromoter<br>P201117 2810423E13Rik  | Zcsl2         | 1.913 | 6.23 |
| 14127533 | ProximalPromoter                                         | 2810423E13Rik | 1.912 | 0.5  |
| 14126029 | P102631 Top3a ProximalPromoter                           | Top3a         | 1.909 | 3.35 |
| 14124281 | P209909 Parp3 ProximalPromoter<br>P208372 Zswim1         | Parp3         | 1.908 | 6.23 |
| 14122580 | ProximalPromoter                                         | Zswim1        | 1.908 | 5.28 |
| 14124402 | P104047 Ndufs8 ProximalPromoter                          | Ndufs8        | 1.908 | 4.2  |
| 14113896 | P100835 Id2 ProximalPromoter                             | Id2           | 1.907 | 1.71 |
| 14118778 | P200896 Rfxdc1 ProximalPromoter                          | Rfxdc1        | 1.905 | 0.5  |
| 14121992 | P203032 Nbr1 ProximalPromoter<br>P103799 M6prbp1         | Nbr1          | 1.905 | 0.57 |
| 14118553 | ProximalPromoter<br>P209636 AB041803                     | M6prbp1       | 1.904 | 0.35 |
| 14120886 | ProximalPromoter                                         | AB041803      | 1.904 | 0.94 |
| 14115734 | P206190 Hspa1l ProximalPromoter                          | Hspa1l        | 1.904 | 2.67 |
| 14119691 | P208147 Gtpbp4 ProximalPromoter                          | Gtpbp4        | 1.9   | 1.02 |
| 14129139 | P204710 Myt1 ProximalPromoter                            | Myt1          | 1.897 | 4.2  |
| 14121210 | P204473 Gpr3 ProximalPromoter<br>P200763 A930037G23Rik   | Gpr3          | 1.896 | 1.55 |
| 14116655 | ProximalPromoter                                         | A930037G23Rik | 1.893 | 1.71 |
| 14117655 | P101370 Slc7a8 ProximalPromoter                          | Slc7a8        | 1.891 | 8.4  |
| 14124824 | P103477 Slc2a5 ProximalPromoter<br>P104030 Aldh6a1       | Slc2a5        | 1.888 | 0    |
| 14129829 | ProximalPromoter<br>P103722 Rps27a                       | Aldh6a1       | 1.887 | 1.71 |
| 14120190 | ProximalPromoter                                         | Rps27a        | 1.886 | 0.94 |
| 14116270 | P200883 Casc1 ProximalPromoter                           | Casc1         | 1.883 | 1.55 |
| 14122863 | P204020 Prmt1 ProximalPromoter                           | Prmt1         | 1.879 | 0    |
| 14117650 | P101400 Eef1b2 ProximalPromoter                          | Eef1b2        | 1.876 | 9.95 |
| 14129617 | P200664 Mrps31 ProximalPromoter<br>P208644 1810054G18Rik | Mrps31        | 1.876 | 7.17 |
| 14125895 | ProximalPromoter                                         | 1810054G18Rik | 1.876 | 1.71 |
| 14123243 | P201832 Cdca1 ProximalPromoter                           | Cdca1         | 1.871 | 0    |
| 14115124 | P100733 Cops2 ProximalPromoter<br>P202932 AI256775       | Cops2         | 1.865 | 0.35 |
| 14128740 | ProximalPromoter                                         | AI256775      | 1.863 | 4.2  |
| 14114503 | P203822 Lmo1 ProximalPromoter                            | Lmo1          | 1.863 | 3.35 |
| 14112494 | P209585 Fus ProximalPromoter                             | Fus           | 1.862 | 1.02 |
| 14126463 | P103261 Vps45 ProximalPromoter                           | Vps45         | 1.861 | 2.14 |
| 14123174 | P105246 Rnase4 DistalPromoter                            | Rnase4        | 1.861 | 0.35 |
| 14126796 | P210013 Atf7 ProximalPromoter                            | Atf7          | 1.856 | 4.73 |
| 14114973 | P206391 Fbxo18 ProximalPromoter<br>P208364 Rpusd1        | Fbxo18        | 1.856 | 2.14 |
| 14116724 | ProximalPromoter                                         | Rpusd1        | 1.854 | 9.95 |
| 14119191 | P208491 Eif3s12 ProximalPromoter                         | Eif3s12       | 1.854 | 9.95 |
| 14122405 | P203343 Sfxn3 ProximalPromoter                           | Sfxn3         | 1.853 | 4.73 |
| 14114933 | P203284 Ptges2 ProximalPromoter                          | Ptges2        | 1.853 | 0.35 |
| 14112479 | P200768 Dbc1 ProximalPromoter                            | Dbc1          | 1.853 | 9.95 |
| 14112451 | P205623 Mettl1 ProximalPromoter                          | Mettl1        | 1.852 | 6.23 |
| 14110420 | P200256 Imp4 ProximalPromoter<br>P200258 2010100O12Rik   | Imp4          | 1.845 | 1.2  |
| 14117108 | ProximalPromoter                                         | 2010100O12Rik | 1.845 | 5.28 |
| 14119310 | P100296 Stt3a ProximalPromoter                           | Stt3a         | 1.845 | 0.5  |



|          |                                 |               |       |      |
|----------|---------------------------------|---------------|-------|------|
| 14119932 | P204135 Art5 ProximalPromoter   | Art5          | 1.844 | 5.28 |
| 14120770 | P203904 Zbtb5 ProximalPromoter  | Zbtb5         | 1.844 | 1.71 |
| 14121830 | P101509 Tagln3 ProximalPromoter | Tagln3        | 1.84  | 4.2  |
|          | P209931 Cd3eap                  |               |       |      |
| 14114260 | ProximalPromoter                | Cd3eap        | 1.84  | 5.28 |
| 14123287 | P204696 Mast2 ProximalPromoter  | Mast2         | 1.839 | 0.46 |
|          | P201808 Rapgef3                 |               |       |      |
| 14123244 | ProximalPromoter                | Rapgef3       | 1.839 | 8.4  |
| 14122875 | P204647 Ly6e ProximalPromoter   | Ly6e          | 1.838 | 8.4  |
|          | P210040 Slc25a25                |               |       |      |
| 14116759 | ProximalPromoter                | Slc25a25      | 1.835 | 0.5  |
| 14114178 | P200459 Irf3 ProximalPromoter   | Irf3          | 1.834 | 2.14 |
|          | P209984 Ccdc77                  |               |       |      |
| 14127634 | ProximalPromoter                | Ccdc77        | 1.834 | 3.35 |
|          | P100206 Slc37a4                 |               |       |      |
| 14116806 | ProximalPromoter                | Slc37a4       | 1.834 | 9.95 |
| 14111977 | P200134 Asf1b ProximalPromoter  | Asf1b         | 1.831 | 0    |
| 14117097 | P207820 Ube3b ProximalPromoter  | Ube3b         | 1.831 | 1.55 |
| 14124199 | P209467 Adk ProximalPromoter    | Adk           | 1.83  | 5.28 |
|          | P209603 Dennd4b                 |               |       |      |
| 14113363 | ProximalPromoter                | Dennd4b       | 1.829 | 0.8  |
| 14128776 | P202980 Tbp ProximalPromoter    | Tbp           | 1.828 | 0.8  |
|          | P208555 2210009G21Rik           |               |       |      |
| 14130082 | ProximalPromoter                | 2210009G21Rik | 1.826 | 2.14 |
|          | P200925 Nudcd3                  |               |       |      |
| 14116272 | ProximalPromoter                | Nudcd3        | 1.825 | 7.17 |
| 14116241 | P200660 Phf23 ProximalPromoter  | Phf23         | 1.824 | 4.2  |
|          | P200153 Tsnaxip1                |               |       |      |
| 14112808 | ProximalPromoter                | Tsnaxip1      | 1.821 | 5.28 |
| 14129384 | P101883 Blzf1 ProximalPromoter  | Blzf1         | 1.821 | 0.35 |
| 14128238 | P106368 Gramd1a DistalPromoter  | Gramd1a       | 1.821 | 0    |
| 14119585 | P200661 Pard6a ProximalPromoter | Pard6a        | 1.82  | 3.35 |
| 14115814 | P202597 Apip ProximalPromoter   | Apip          | 1.82  | 4.73 |
| 14110311 | P201300 Stch ProximalPromoter   | Stch          | 1.819 | 1.55 |
|          | P101861 Serpinb1a               |               |       |      |
| 14115139 | ProximalPromoter                | Serpinb1a     | 1.818 | 0.57 |
| 14119550 | P205100 Vamp1 ProximalPromoter  | Vamp1         | 1.818 | 0    |
|          | P206736 Mre11a                  |               |       |      |
| 14119573 | ProximalPromoter                | Mre11a        | 1.818 | 1.02 |
|          | P210361 Prkcbp1                 |               |       |      |
| 14129694 | ProximalPromoter                | Prkcbp1       | 1.815 | 1.55 |
|          | P210413 4930544G21Rik           |               |       |      |
| 14118854 | ProximalPromoter                | 4930544G21Rik | 1.814 | 3.35 |
|          | P101785 2210013K02Rik           |               |       |      |
| 14121024 | ProximalPromoter                | 2210013K02Rik | 1.814 | 2.14 |
| 14114738 | P102370 Htf9c ProximalPromoter  | Htf9c         | 1.814 | 1.2  |
| 14115117 | P101093 Ets2 ProximalPromoter   | Ets2          | 1.813 | 1.71 |
| 14117698 | P102941 Mnt ProximalPromoter    | Mnt           | 1.813 | 0.35 |
|          | P103036 Khdrbs1                 |               |       |      |
| 14116026 | ProximalPromoter                | Khdrbs1       | 1.809 | 5.28 |
|          | P103093 Tnfrsf1a                |               |       |      |
| 14124794 | ProximalPromoter                | Tnfrsf1a      | 1.808 | 2.67 |
|          | P203707 4930451111Rik           |               |       |      |
| 14115776 | ProximalPromoter                | 4930451111Rik | 1.806 | 1.2  |
| 14115571 | P100949 Pscd3 ProximalPromoter  | Pscd3         | 1.805 | 1.2  |

|          |                                 |               |       |      |
|----------|---------------------------------|---------------|-------|------|
|          | P103876 Dnajb11                 |               |       |      |
| 14114787 | ProximalPromoter                | Dnajb11       | 1.805 | 7.17 |
| 14121853 | P102264 Erh ProximalPromoter    | Erh           | 1.804 | 4.2  |
| 14123776 | P200989 Hook2 ProximalPromoter  | Hook2         | 1.801 | 1.55 |
|          | P209444 Aldh6a1                 |               |       |      |
| 14127544 | ProximalPromoter                | Aldh6a1       | 1.8   | 2.14 |
| 14111595 | P203228 Riok2 ProximalPromoter  | Riok2         | 1.799 | 7.17 |
| 14115985 | P101135 Poli ProximalPromoter   | Poli          | 1.798 | 4.2  |
|          | P208804 2900092E17Rik           |               |       |      |
| 14125074 | ProximalPromoter                | 2900092E17Rik | 1.795 | 0    |
|          | P200747 Neurod1                 |               |       |      |
| 14122512 | ProximalPromoter                | Neurod1       | 1.793 | 2.67 |
| 14115583 | P102059 Rps27l ProximalPromoter | Rps27l        | 1.793 | 0    |
| 14117937 | P207802 Hat1 ProximalPromoter   | Hat1          | 1.789 | 2.14 |
| 14125253 | P106901 Pla2g2c DistalPromoter  | Pla2g2c       | 1.788 | 1.02 |
|          | P207523 Hspc171                 |               |       |      |
| 14128449 | ProximalPromoter                | Hspc171       | 1.786 | 0.57 |
| 14117940 | P200252 Cox11 ProximalPromoter  | Cox11         | 1.786 | 1.71 |
|          | P210071 6330581L23Rik           |               |       |      |
| 14112582 | ProximalPromoter                | 6330581L23Rik | 1.785 | 5.28 |
| 14111377 | P101560 Cript ProximalPromoter  | Cript         | 1.785 | 1.2  |
| 14118674 | P204249 Cidea ProximalPromoter  | Cidea         | 1.785 | 6.23 |
| 14123960 | P103147 Psmc4 ProximalPromoter  | Psmc4         | 1.785 | 0.8  |
| 14123076 | P100099 Cdc2l1 ProximalPromoter | Cdc2l1        | 1.785 | 1.55 |
|          | P202584 Ankmy2                  |               |       |      |
| 14113306 | ProximalPromoter                | Ankmy2        | 1.784 | 4.2  |
|          | P202906 Atp6v0d1                |               |       |      |
| 14120723 | ProximalPromoter                | Atp6v0d1      | 1.783 | 9.95 |
|          | P200236 Aasdhppt                |               |       |      |
| 14123797 | ProximalPromoter                | Aasdhppt      | 1.783 | 7.17 |
| 14120495 | P209175 Nek8 ProximalPromoter   | Nek8          | 1.779 | 1.71 |
|          | P201676 A630050E13Rik           |               |       |      |
| 14116567 | ProximalPromoter                | A630050E13Rik | 1.778 | 5.28 |
| 14116007 | P101903 Rpl15 ProximalPromoter  | Rpl15         | 1.775 | 9.95 |
|          | P203650 2810485I05Rik           |               |       |      |
| 14128226 | ProximalPromoter                | 2810485I05Rik | 1.774 | 0.5  |
| 14119551 | P205076 Tpi1 ProximalPromoter   | Tpi1          | 1.773 | 3.35 |
| 14125062 | P209631 Zfp119 ProximalPromoter | Zfp119        | 1.773 | 2.67 |
| 14121155 | P203533 Avpi1 ProximalPromoter  | Avpi1         | 1.772 | 7.17 |
|          | P200353 Cenpc1                  |               |       |      |
| 14126718 | ProximalPromoter                | Cenpc1        | 1.772 | 1.55 |
|          | P202594 Depdc1b                 |               |       |      |
| 14125850 | ProximalPromoter                | Depdc1b       | 1.77  | 1.02 |
|          | P209958 BC031781                |               |       |      |
| 14120947 | ProximalPromoter                | BC031781      | 1.77  | 3.35 |
| 14115896 | P209001 Pard3 ProximalPromoter  | Pard3         | 1.77  | 1.71 |
| 14113080 | P102016 Pnpla8 ProximalPromoter | Pnpla8        | 1.769 | 5.28 |
| 14123445 | P210092 Zfp426 ProximalPromoter | Zfp426        | 1.769 | 0.35 |
|          | P103648 Atp6v1g2                |               |       |      |
| 14115591 | ProximalPromoter                | Atp6v1g2      | 1.768 | 3.35 |
| 14122658 | P100291 Ins2 ProximalPromoter   | Ins2          | 1.767 | 0    |
|          | P206499 Ppp2r1a                 |               |       |      |
| 14130017 | ProximalPromoter                | Ppp2r1a       | 1.765 | 1.02 |
|          | P207967 4432405B04Rik           |               |       |      |
| 14120491 | ProximalPromoter                | 4432405B04Rik | 1.764 | 3.35 |

|          |                                  |               |       |      |
|----------|----------------------------------|---------------|-------|------|
| 14124227 | P209710 Sgip1 ProximalPromoter   | Sgip1         | 1.764 | 0.5  |
| 14114126 | P204772 Pcx ProximalPromoter     | Pcx           | 1.764 | 0.57 |
| 14122992 | P207449 Krtcap2 ProximalPromoter | Krtcap2       | 1.763 | 8.4  |
|          | P202889 C630025C03               |               |       |      |
| 14124102 | ProximalPromoter                 | C630025C03    | 1.763 | 2.14 |
| 14121260 | P200491 Tapbp ProximalPromoter   | Tapbp         | 1.762 | 2.14 |
|          | P201097 BC005624                 |               |       |      |
| 14121685 | ProximalPromoter                 | BC005624      | 1.761 | 8.4  |
|          | P209568 Slc25a36                 |               |       |      |
| 14119217 | ProximalPromoter                 | Slc25a36      | 1.759 | 1.02 |
| 14114280 | P101009 Sin3a ProximalPromoter   | Sin3a         | 1.759 | 2.14 |
| 14117270 | P103103 Ube1c ProximalPromoter   | Ube1c         | 1.757 | 9.95 |
| 14125218 | P103057 Smpd1 ProximalPromoter   | Smpd1         | 1.757 | 1.55 |
| 14111536 | P203451 Lrrc46 ProximalPromoter  | Lrrc46        | 1.757 | 0.57 |
| 14124550 | P204480 Rhpn1 ProximalPromoter   | Rhpn1         | 1.757 | 0    |
| 14125853 | P200730 Hook1 ProximalPromoter   | Hook1         | 1.756 | 8.4  |
| 14119241 | P208977 Prcc ProximalPromoter    | Prcc          | 1.753 | 1.71 |
|          | P200503 Dcun1d5                  |               |       |      |
| 14120424 | ProximalPromoter                 | Dcun1d5       | 1.751 | 4.2  |
|          | P202404 E230022H04Rik            |               |       |      |
| 14114148 | ProximalPromoter                 | E230022H04Rik | 1.751 | 0.94 |
| 14113519 | P102928 Psmb8 ProximalPromoter   | Psmb8         | 1.751 | 0    |
| 14124553 | P204498 Guk1 ProximalPromoter    | Guk1          | 1.747 | 0    |
|          | P103237 Trappc3                  |               |       |      |
| 14126464 | ProximalPromoter                 | Trappc3       | 1.747 | 4.2  |
|          | P208697 1700022C21Rik            |               |       |      |
| 14121316 | ProximalPromoter                 | 1700022C21Rik | 1.747 | 1.02 |
| 14123268 | P201411 Mcm4 ProximalPromoter    | Mcm4          | 1.746 | 1.55 |
| 14114336 | P101783 Zfp306 ProximalPromoter  | Zfp306        | 1.745 | 2.14 |
| 14113765 | P200233 Tprkb ProximalPromoter   | Tprkb         | 1.745 | 3.35 |
| 14115825 | P200721 Cstad ProximalPromoter   | Cstad         | 1.744 | 2.14 |
|          | P202874 2810426N06Rik            |               |       |      |
| 14114906 | ProximalPromoter                 | 2810426N06Rik | 1.742 | 1.55 |
|          | P206936 Gabarapl1                |               |       |      |
| 14118345 | ProximalPromoter                 | Gabarapl1     | 1.741 | 8.4  |
| 14114451 | P202753 Mettl4 ProximalPromoter  | Mettl4        | 1.741 | 4.2  |
| 14128108 | P100827 Hnrpa1 ProximalPromoter  | Hnrpa1        | 1.741 | 4.73 |
| 14129757 | P100179 Etv1 ProximalPromoter    | Etv1          | 1.741 | 1.55 |
| 14128835 | P209813 Myl4 ProximalPromoter    | Myl4          | 1.74  | 1.71 |
| 14128012 | P208023 Rpa3 ProximalPromoter    | Rpa3          | 1.739 | 8.4  |
|          | P202455 4930469P12Rik            |               |       |      |
| 14124118 | ProximalPromoter                 | 4930469P12Rik | 1.739 | 0.46 |
| 14118646 | P203079 Dhx29 ProximalPromoter   | Dhx29         | 1.739 | 0.8  |
|          | P208660 4930431B11Rik            |               |       |      |
| 14117138 | ProximalPromoter                 | 4930431B11Rik | 1.737 | 5.28 |
| 14115756 | P205703 PcnA ProximalPromoter    | Pcna          | 1.736 | 4.2  |
| 14116711 | P209598 Cdc26 ProximalPromoter   | Cdc26         | 1.736 | 5.28 |
| 14113615 | P202766 Stip1 ProximalPromoter   | Stip1         | 1.73  | 1.71 |
| 14128263 | P203674 Rab2b ProximalPromoter   | Rab2b         | 1.729 | 4.2  |
|          | P208299 3110023G01Rik            |               |       |      |
| 14119227 | ProximalPromoter                 | 3110023G01Rik | 1.728 | 0.8  |
| 14112743 | P106265 Eif4e3 DistalPromoter    | Eif4e3        | 1.728 | 0    |
| 14119045 | P106489 Ndufs8 DistalPromoter    | Ndufs8        | 1.728 | 7.17 |
| 14110324 | P203808 Mrpl32 ProximalPromoter  | Mrpl32        | 1.724 | 0.8  |

|          |                                        |               |       |      |
|----------|----------------------------------------|---------------|-------|------|
| 14124340 | P101354 Cks1b ProximalPromoter         | Cks1b         | 1.723 | 6.23 |
| 14129776 | P101301 Nsbp1 ProximalPromoter         | Nsbp1         | 1.723 | 1.02 |
| 14126244 | P205840 St3gal5 ProximalPromoter       | St3gal5       | 1.722 | 0    |
| 14116641 | P206495 Cnot4 ProximalPromoter         | Cnot4         | 1.721 | 4.2  |
| 14116675 | P209549 Tst ProximalPromoter           | Tst           | 1.72  | 5.28 |
| 14110581 | P103125 Zfp148 ProximalPromoter        | Zfp148        | 1.72  | 2.67 |
| 14119328 | P101442 Cacng4 ProximalPromoter        | Cacng4        | 1.717 | 5.28 |
| 14115792 | P205606 Ccndbp1 ProximalPromoter       | Ccndbp1       | 1.716 | 1.71 |
| 14121993 | P203099 4930579K19Rik ProximalPromoter | 4930579K19Rik | 1.716 | 2.67 |
| 14122830 | P203989 Bmyc ProximalPromoter          | Bmyc          | 1.715 | 1.71 |
| 14126741 | P209558 Nap1l3 ProximalPromoter        | Nap1l3        | 1.714 | 4.2  |
| 14122105 | P206313 Cdk2ap1 ProximalPromoter       | Cdk2ap1       | 1.714 | 0.94 |
| 14111226 | P200537 Prpf3 ProximalPromoter         | Prpf3         | 1.711 | 1.55 |
| 14129102 | P201723 Tmem16k ProximalPromoter       | Tmem16k       | 1.709 | 2.14 |
| 14120162 | P101407 Nup210 ProximalPromoter        | Nup210        | 1.708 | 1.55 |
| 14127592 | P207607 Ormdl3 ProximalPromoter        | Ormdl3        | 1.706 | 9.95 |
| 14121217 | P205522 Igfbp4 ProximalPromoter        | Igfbp4        | 1.706 | 2.14 |
| 14111327 | P210763 Slc43a2 ProximalPromoter       | Slc43a2       | 1.706 | 9.95 |
| 14118279 | P203236 2410091C18Rik ProximalPromoter | 2410091C18Rik | 1.705 | 7.17 |
| 14116185 | P204979 Sstr3 ProximalPromoter         | Sstr3         | 1.705 | 6.23 |
| 14120374 | P204485 Grn ProximalPromoter           | Grn           | 1.704 | 9.95 |
| 14117862 | P204478 Gpx3 ProximalPromoter          | Gpx3          | 1.703 | 0.35 |
| 14125941 | P207243 Usmg5 ProximalPromoter         | Usmg5         | 1.703 | 1.71 |
| 14122594 | P207309 Sars2 ProximalPromoter         | Sars2         | 1.702 | 6.23 |
| 14116430 | P103564 Rpl35a ProximalPromoter        | Rpl35a        | 1.699 | 7.17 |
| 14129619 | P200614 Dhx38 ProximalPromoter         | Dhx38         | 1.698 | 1.02 |
| 14111727 | P207566 Pnkd ProximalPromoter          | Pnkd          | 1.698 | 7.17 |
| 14116566 | P201700 Tmem153 ProximalPromoter       | Tmem153       | 1.697 | 0.46 |
| 14128384 | P209244 Acot8 ProximalPromoter         | Acot8         | 1.695 | 6.23 |
| 14116817 | P101430 Pabpn1 ProximalPromoter        | Pabpn1        | 1.695 | 4.73 |
| 14122864 | P203995 Mrpl46 ProximalPromoter        | Mrpl46        | 1.695 | 1.71 |
| 14125989 | P100706 Cct6a ProximalPromoter         | Cct6a         | 1.693 | 5.28 |
| 14116995 | P202815 4833418A01Rik ProximalPromoter | 4833418A01Rik | 1.692 | 6.23 |
| 14118658 | P201962 Amph ProximalPromoter          | Amph          | 1.691 | 2.14 |
| 14126554 | P201803 2810012G03Rik ProximalPromoter | 2810012G03Rik | 1.691 | 0.35 |
| 14130051 | P209553 Med9 ProximalPromoter          | Med9          | 1.691 | 0.5  |
| 14117841 | P204352 Eif4e ProximalPromoter         | Eif4e         | 1.69  | 7.17 |
| 14117983 | P207954 Tceb1 ProximalPromoter         | Tceb1         | 1.69  | 5.28 |
| 14119357 | P103451 Gosr2 ProximalPromoter         | Gosr2         | 1.69  | 5.28 |
| 14121835 | P101479 Adar ProximalPromoter          | Adar          | 1.689 | 1.02 |
| 14121276 | P207834 Mtfr1 ProximalPromoter         | Mtfr1         | 1.688 | 0.57 |
| 14115394 | P206723 Shoc2 ProximalPromoter         | Shoc2         | 1.686 | 3.35 |

|          |                                        |               |       |      |
|----------|----------------------------------------|---------------|-------|------|
| 14115971 | P101855 Bccip ProximalPromoter         | Bccip         | 1.686 | 1.55 |
| 14116644 | P206422 Mpp2 ProximalPromoter          | Mpp2          | 1.685 | 0    |
| 14112585 | P209031 Kihl1 ProximalPromoter         | Kihl1         | 1.685 | 4.2  |
| 14126447 | P102439 Mrg2 ProximalPromoter          | Mrg2          | 1.685 | 9.95 |
| 14125920 | P208379 D1Bwg0212e ProximalPromoter    | D1Bwg0212e    | 1.684 | 0    |
| 14126623 | P205718 Pip5k3 ProximalPromoter        | Pip5k3        | 1.684 | 8.4  |
| 14119529 | P204980 Snca ProximalPromoter          | Snca          | 1.683 | 8.4  |
| 14119798 | P104003 Eif3s3 ProximalPromoter        | Eif3s3        | 1.682 | 0    |
| 14117406 | P202309 Lrrc41 ProximalPromoter        | Lrrc41        | 1.677 | 7.17 |
| 14129987 | P203723 Camta2 ProximalPromoter        | Camta2        | 1.677 | 8.4  |
| 14126268 | P202967 Kif4 ProximalPromoter          | Kif4          | 1.676 | 7.17 |
| 14114601 | P200221 Slc25a35 ProximalPromoter      | Slc25a35      | 1.676 | 6.23 |
| 14113349 | P207710 Rassf7 ProximalPromoter        | Rassf7        | 1.672 | 4.2  |
| 14125782 | P204106 Abcd1 ProximalPromoter         | Abcd1         | 1.672 | 2.14 |
| 14123511 | P101006 Shc1 ProximalPromoter          | Shc1          | 1.671 | 1.71 |
| 14118738 | P206724 Shoc2 ProximalPromoter         | Shoc2         | 1.671 | 0    |
| 14128971 | P103274 Hnf4g ProximalPromoter         | Hnf4g         | 1.67  | 0.57 |
| 14114993 | P201101 6330505F04Rik ProximalPromoter | 6330505F04Rik | 1.669 | 6.23 |
| 14128128 | P101925 Tceal8 ProximalPromoter        | Tceal8        | 1.669 | 1.71 |
| 14113240 | P204139 Atm ProximalPromoter           | Atm           | 1.668 | 1.55 |
| 14125650 | P104017 Pdk2 ProximalPromoter          | Pdk2          | 1.666 | 3.35 |
| 14127288 | P101943 Serbp1 ProximalPromoter        | Serbp1        | 1.666 | 0    |
| 14116012 | P103756 1810011O16Rik ProximalPromoter | 1810011O16Rik | 1.663 | 0.94 |
| 14110106 | P100594 Tpp2 ProximalPromoter          | Tpp2          | 1.663 | 7.17 |
| 14114733 | P100799 Emb ProximalPromoter           | Emb           | 1.663 | 4.73 |
| 14113956 | P103486 Akap8 ProximalPromoter         | Akap8         | 1.662 | 8.4  |
| 14110372 | P206580 Scap2 ProximalPromoter         | Scap2         | 1.662 | 6.23 |
| 14126304 | P200928 Zfp473 ProximalPromoter        | Zfp473        | 1.662 | 5.28 |
| 14119567 | P206791 Tmeff2 ProximalPromoter        | Tmeff2        | 1.662 | 9.95 |
| 14121221 | P205516 Idh1 ProximalPromoter          | Idh1          | 1.661 | 6.23 |
| 14111832 | P103767 Rpl15 ProximalPromoter         | Rpl15         | 1.661 | 9.95 |
| 14118387 | P208777 Hist3h2ba ProximalPromoter     | Hist3h2ba     | 1.66  | 0.8  |
| 14129091 | P203393 Tbc1d17 ProximalPromoter       | Tbc1d17       | 1.659 | 1.2  |
| 14110981 | P102531 Ptbp1 ProximalPromoter         | Ptbp1         | 1.657 | 8.4  |
| 14114329 | P102154 Atp5g1 ProximalPromoter        | Atp5g1        | 1.657 | 2.67 |
| 14113918 | P101603 Dnajc4 ProximalPromoter        | Dnajc4        | 1.657 | 7.17 |
| 14120948 | P209933 Ranbp10 ProximalPromoter       | Ranbp10       | 1.655 | 8.4  |
| 14111610 | P204856 Ptpn ProximalPromoter          | Ptpn          | 1.654 | 2.14 |
| 14115512 | P208134 Stoml1 ProximalPromoter        | Stoml1        | 1.654 | 0    |
| 14128023 | P200036 1110001A07Rik ProximalPromoter | 1110001A07Rik | 1.653 | 9.95 |
| 14129103 | P201698 Phtf2 ProximalPromoter         | Phtf2         | 1.652 | 1.71 |
| 14121268 | P200976 Igsf1 ProximalPromoter         | Igsf1         | 1.652 | 1.55 |
| 14118517 | P103841 2410016F19Rik ProximalPromoter | 2410016F19Rik | 1.652 | 3.35 |
| 14110725 | P202909 Kif20a ProximalPromoter        | Kif20a        | 1.651 | 4.73 |

|          |                                    |               |       |      |
|----------|------------------------------------|---------------|-------|------|
| 14122273 | P102103 Tmem59<br>ProximalPromoter | Tmem59        | 1.651 | 4.2  |
|          | P209300 Arhgap27                   |               |       |      |
| 14114170 | ProximalPromoter                   | Arhgap27      | 1.649 | 1.02 |
| 14118500 | P102671 Zfpm1 ProximalPromoter     | Zfpm1         | 1.649 | 8.4  |
| 14129796 | P102027 Uqcrb ProximalPromoter     | Uqcrb         | 1.648 | 4.2  |
| 14124098 | P202305 Smcr8 ProximalPromoter     | Smcr8         | 1.647 | 2.14 |
| 14125014 | P206859 Gart ProximalPromoter      | Gart          | 1.647 | 8.4  |
| 14119868 | P201750 Stxbp5l ProximalPromoter   | Stxbp5l       | 1.647 | 4.2  |
| 14121247 | P201635 ProximalPromoter           |               | 1.646 | 0    |
| 14115057 | P208922 Wasf1 ProximalPromoter     | Wasf1         | 1.645 | 0.57 |
| 14118479 | P101868 Nicn1 ProximalPromoter     | Nicn1         | 1.645 | 1.02 |
| 14112017 | P202668 Gloxd1 ProximalPromoter    | Gloxd1        | 1.645 | 6.23 |
| 14122828 | P203020 Ptdss1 ProximalPromoter    | Ptdss1        | 1.643 | 0.94 |
|          | P103893 2810417H13Rik              |               |       |      |
| 14110603 | ProximalPromoter                   | 2810417H13Rik | 1.643 | 1.71 |
| 14124621 | P207810 Fundc2 ProximalPromoter    | Fundc2        | 1.643 | 4.2  |
| 14119134 | P205357 Opn3 ProximalPromoter      | Opn3          | 1.641 | 3.35 |
| 14120486 | P207991 Yif1a ProximalPromoter     | Yif1a         | 1.641 | 2.14 |
| 14122519 | P201255 ProximalPromoter           |               | 1.639 | 5.28 |
| 14113794 | P208659 Giyd2 ProximalPromoter     | Giyd2         | 1.638 | 9.95 |
| 14125355 | P203202 Thbd ProximalPromoter      | Thbd          | 1.638 | 6.23 |
| 14128720 | P205025 Syt4 ProximalPromoter      | Syt4          | 1.636 | 8.4  |
| 14120842 | P202352 Zfp668 ProximalPromoter    | Zfp668        | 1.635 | 9.95 |
| 14117652 | P101352 Cd164 ProximalPromoter     | Cd164         | 1.634 | 5.28 |
| 14124354 | P102517 Ppgb ProximalPromoter      | Ppgb          | 1.634 | 1.02 |
| 14115975 | P101849 Acy1 ProximalPromoter      | Acy1          | 1.63  | 2.14 |
| 14129222 | P208519 Pop7 ProximalPromoter      | Pop7          | 1.63  | 2.14 |
| 14112670 | P103425 Refbp2 ProximalPromoter    | Refbp2        | 1.63  | 0.57 |
| 14114311 | P101369 ProximalPromoter           |               | 1.63  | 1.55 |
| 14126678 | P206468 Pdlim3 ProximalPromoter    | Pdlim3        | 1.63  | 4.2  |
| 14124408 | P104911 Bcap31 DistalPromoter      | Bcap31        | 1.63  | 7.17 |
| 14123201 | P105826 Insl3 DistalPromoter       | Insl3         | 1.629 | 2.67 |
| 14119531 | P204646 Blnk ProximalPromoter      | Blnk          | 1.627 | 0.46 |
| 14128799 | P210301 Mylip ProximalPromoter     | Mylip         | 1.626 | 0    |
| 14127656 | P101013 Snrp1c ProximalPromoter    | Snrp1c        | 1.626 | 0.8  |
|          | P202067 Tmem109                    |               |       |      |
| 14123670 | ProximalPromoter                   | Tmem109       | 1.626 | 1.71 |
| 14117828 | P201508 Sfxn5 ProximalPromoter     | Sfxn5         | 1.623 | 7.17 |
| 14117674 | P102131 Adh1 ProximalPromoter      | Adh1          | 1.622 | 9.95 |
| 14127777 | P105134 Ankrd49 DistalPromoter     | Ankrd49       | 1.62  | 7.17 |
| 14119667 | P210328 Klhl26 ProximalPromoter    | Klhl26        | 1.62  | 3.35 |
| 14112800 | P202002 Amacr ProximalPromoter     | Amacr         | 1.619 | 9.95 |
| 14124597 | P200571 Pop1 ProximalPromoter      | Pop1          | 1.618 | 4.73 |
| 14120830 | P206877 Aamp ProximalPromoter      | Aamp          | 1.618 | 4.2  |
| 14128864 | P210319 Abcc10 ProximalPromoter    | Abcc10        | 1.617 | 1.71 |
|          | P209235 Slc24a6                    |               |       |      |
| 14118356 | ProximalPromoter                   | Slc24a6       | 1.617 | 0.8  |
| 14125857 | P200724 Polq ProximalPromoter      | Polq          | 1.617 | 1.2  |
| 14117989 | P200081 Serbp1 ProximalPromoter    | Serbp1        | 1.616 | 0    |
| 14128347 | P206352 Fbxl6 ProximalPromoter     | Fbxl6         | 1.614 | 1.02 |
| 14126908 | P104108 Cpt1c ProximalPromoter     | Cpt1c         | 1.612 | 9.95 |
| 14122026 | P204056 Afmid ProximalPromoter     | Afmid         | 1.611 | 2.14 |
| 14122876 | P204623 Arhgef1                    | Arhgef1       | 1.61  | 1.2  |

|          |                                                          |               |       |      |
|----------|----------------------------------------------------------|---------------|-------|------|
|          | ProximalPromoter<br>P101506 Pdcd10                       |               |       |      |
| 14111798 | ProximalPromoter                                         | Pdcd10        | 1.609 | 6.23 |
| 14111865 | P103797 Eif4e3 ProximalPromoter<br>P209643 Tmem63a       | Eif4e3        | 1.607 | 9.95 |
| 14120882 | ProximalPromoter                                         | Tmem63a       | 1.604 | 7.17 |
| 14128009 | P208005 Mrpl24 ProximalPromoter                          | Mrpl24        | 1.603 | 9.95 |
| 14116210 | P205885 Stat3 ProximalPromoter<br>P207476 Tomm7          | Stat3         | 1.602 | 0    |
| 14112127 | ProximalPromoter<br>P209892 Tmem159                      | Tomm7         | 1.602 | 9.95 |
| 14128465 | ProximalPromoter                                         | Tmem159       | 1.601 | 3.35 |
| 14122253 | P101287 Ahcy ProximalPromoter                            | Ahcy          | 1.6   | 7.17 |
| 14127902 | P201275 Bcas3 ProximalPromoter                           | Bcas3         | 1.6   | 8.4  |
| 14123912 | P100016 Agt ProximalPromoter<br>P208261 4933434E20Rik    | Agt           | 1.599 | 1.55 |
| 14116720 | ProximalPromoter<br>P204976 Ighmbp2                      | 4933434E20Rik | 1.599 | 9.95 |
| 14125378 | ProximalPromoter<br>P209721 BC019943                     | Ighmbp2       | 1.598 | 6.23 |
| 14122990 | ProximalPromoter                                         | BC019943      | 1.598 | 8.4  |
| 14115144 | P101459 Ensa ProximalPromoter                            | Ensa          | 1.598 | 0.35 |
| 14129269 | P207775 Med31 ProximalPromoter                           | Med31         | 1.597 | 5.28 |
| 14111391 | P100840 ProximalPromoter<br>P208730 2410166I05Rik        |               | 1.595 | 1.55 |
| 14110447 | ProximalPromoter                                         | 2410166I05Rik | 1.594 | 0.94 |
| 14115839 | P209561 Mthfd1 ProximalPromoter<br>P208090 1110012L19Rik | Mthfd1        | 1.594 | 6.23 |
| 14112971 | ProximalPromoter                                         | 1110012L19Rik | 1.594 | 4.2  |
| 14127596 | P207601 Rdm1 ProximalPromoter                            | Rdm1          | 1.593 | 0    |
| 14114888 | P202434 Pop4 ProximalPromoter                            | Pop4          | 1.592 | 1.2  |
| 14117633 | P100602 Mpst ProximalPromoter                            | Mpst          | 1.592 | 6.23 |
| 14119247 | P207381 Mrpl28 ProximalPromoter                          | Mrpl28        | 1.592 | 9.95 |
| 14117440 | P204388 Fbl ProximalPromoter<br>P203056 Gabpb2           | Fbl           | 1.589 | 1.55 |
| 14121991 | ProximalPromoter                                         | Gabpb2        | 1.589 | 2.67 |
| 14113637 | P202089 Huwe1 ProximalPromoter                           | Huwe1         | 1.588 | 1.02 |
| 14121061 | P103692 Rdh14 ProximalPromoter                           | Rdh14         | 1.587 | 9.95 |
| 14120900 | P208759 Mllt3 ProximalPromoter<br>P200124 1600014C10Rik  | Mllt3         | 1.586 | 9.95 |
| 14119501 | ProximalPromoter                                         | 1600014C10Rik | 1.586 | 7.17 |
| 14126755 | P208391 Ddx42 ProximalPromoter                           | Ddx42         | 1.584 | 1.2  |
| 14128364 | P202390 Bet1 ProximalPromoter<br>P209989 Tcp11I2         | Bet1          | 1.584 | 0.8  |
| 14125091 | ProximalPromoter                                         | Tcp11I2       | 1.583 | 5.28 |
| 14112869 | P205902 Tacc3 ProximalPromoter                           | Tacc3         | 1.582 | 8.4  |
| 14123003 | P208093 Deb1 ProximalPromoter                            | Deb1          | 1.582 | 4.2  |
| 14129911 | P106433 Klf16 DistalPromoter                             | Klf16         | 1.582 | 1.55 |
| 14127722 | P103328 Pdlim3 ProximalPromoter<br>P207513 1810021J13Rik | Pdlim3        | 1.581 | 5.28 |
| 14115077 | ProximalPromoter<br>P101879 Hspc171                      | 1810021J13Rik | 1.578 | 1.02 |
| 14116008 | ProximalPromoter                                         | Hspc171       | 1.576 | 3.35 |
| 14119342 | P102605 Tapbp ProximalPromoter                           | Tapbp         | 1.576 | 6.23 |
| 14112699 | P103833 Nt5c3 ProximalPromoter                           | Nt5c3         | 1.575 | 4.2  |

|          |                                                          |               |       |      |
|----------|----------------------------------------------------------|---------------|-------|------|
| 14123965 | P102745 Cish ProximalPromoter<br>P101668 2210009G21Rik   | Cish          | 1.574 | 3.35 |
| 14112213 | ProximalPromoter                                         | 2210009G21Rik | 1.572 | 2.14 |
| 14114076 | P203956 Zfp319 ProximalPromoter<br>P202428 4732496O08Rik | Zfp319        | 1.571 | 5.28 |
| 14114147 | ProximalPromoter<br>P207735 2310039H08Rik                | 4732496O08Rik | 1.571 | 7.17 |
| 14116730 | ProximalPromoter                                         | 2310039H08Rik | 1.57  | 2.14 |
| 14115327 | P202663 Nucks1 ProximalPromoter<br>P209206 Rtn4ip1       | Nucks1        | 1.57  | 0    |
| 14120528 | ProximalPromoter                                         | Rtn4ip1       | 1.57  | 6.23 |
| 14128448 | P207547 Mcts2 ProximalPromoter                           | Mcts2         | 1.569 | 3.35 |
| 14125817 | P205390 Fem1b ProximalPromoter                           | Fem1b         | 1.568 | 4.2  |
| 14116992 | P201520 ProximalPromoter                                 |               | 1.566 | 0.8  |
| 14124492 | P207011 Ap4m1 ProximalPromoter                           | Ap4m1         | 1.566 | 8.4  |
| 14123918 | P101552 Fkbpl ProximalPromoter<br>P206853 C1qtnf1        | Fkbpl         | 1.565 | 9.95 |
| 14124175 | ProximalPromoter                                         | C1qtnf1       | 1.565 | 4.2  |
| 14122811 | P203141 Pigp ProximalPromoter                            | Pigp          | 1.565 | 2.67 |
| 14114369 | P104068 Ldlrap1 ProximalPromoter                         | Ldlrap1       | 1.565 | 0.5  |
| 14121895 | P103848 Pnpla8 ProximalPromoter                          | Pnpla8        | 1.563 | 1.02 |
| 14116593 | P205667 Sept2 ProximalPromoter<br>P208643 1700025E21Rik  | 2-Sep         | 1.562 | 4.73 |
| 14122551 | ProximalPromoter<br>P210165 Mapre2                       | 1700025E21Rik | 1.562 | 2.67 |
| 14119634 | ProximalPromoter                                         | Mapre2        | 1.562 | 7.17 |
| 14126777 | P207231 Nono ProximalPromoter<br>P206008 Capn10          | Nono          | 1.56  | 5.28 |
| 14119473 | ProximalPromoter                                         | Capn10        | 1.558 | 2.14 |
| 14127699 | P102584 Slc2a4 ProximalPromoter                          | Slc2a4        | 1.558 | 2.14 |
| 14123871 | P209231 Mtmr4 ProximalPromoter                           | Mtmr4         | 1.557 | 4.2  |
| 14115670 | P105614 Pvrl3 DistalPromoter                             | Pvrl3         | 1.557 | 3.35 |
| 14118061 | P101568 Hacl1 ProximalPromoter                           | Hacl1         | 1.557 | 0.5  |
| 14122131 | P209369 Magi3 ProximalPromoter<br>P210725 C030048B08Rik  | Magi3         | 1.557 | 3.35 |
| 14124701 | ProximalPromoter                                         | C030048B08Rik | 1.556 | 3.35 |
| 14125106 | P207498 Mrps28 ProximalPromoter<br>P101845 1110005A23Rik | Mrps28        | 1.556 | 4.73 |
| 14121824 | ProximalPromoter                                         | 1110005A23Rik | 1.555 | 3.35 |
| 14126675 | P206450 Rap2ip ProximalPromoter                          | Rap2ip        | 1.555 | 8.4  |
| 14128334 | P204770 Pcp4 ProximalPromoter                            | Pcp4          | 1.555 | 5.28 |
| 14120860 | P209254 Asb6 ProximalPromoter                            | Asb6          | 1.554 | 9.95 |
| 14122793 | P203038 Wdfy2 ProximalPromoter                           | Wdfy2         | 1.553 | 3.35 |
| 14128982 | P102818 Fos ProximalPromoter                             | Fos           | 1.553 | 2.67 |
| 14112409 | P204120 Birc2 ProximalPromoter                           | Birc2         | 1.553 | 4.73 |
| 14113260 | P204662 Mcm7 ProximalPromoter<br>P206767 Gabarap         | Mcm7          | 1.551 | 0    |
| 14119568 | ProximalPromoter                                         | Gabarap       | 1.55  | 7.17 |
| 14127307 | P102794 Eif2ak3 ProximalPromoter                         | Eif2ak3       | 1.549 | 5.28 |
| 14125477 | P207195 Nif3l1 ProximalPromoter                          | Nif3l1        | 1.548 | 1.2  |
| 14110146 | P102519 Ppox ProximalPromoter                            | Ppox          | 1.546 | 7.17 |
| 14124799 | P102781 Ddx3x ProximalPromoter                           | Ddx3x         | 1.545 | 6.23 |
| 14123060 | P100867 Ldlr ProximalPromoter                            | Ldlr          | 1.545 | 0    |
| 14124633 | P200224 Qpctl ProximalPromoter                           | Qpctl         | 1.543 | 8.4  |



|          |                                                         |               |       |      |
|----------|---------------------------------------------------------|---------------|-------|------|
| 14126037 | P102247 Dll3 ProximalPromoter<br>P207683 1110004B13Rik  | Dll3          | 1.543 | 1.55 |
| 14123386 | ProximalPromoter                                        | 1110004B13Rik | 1.543 | 4.73 |
| 14124558 | P201274 Cdh7 ProximalPromoter                           | Cdh7          | 1.542 | 0.94 |
| 14115308 | P202016 Lfn5 ProximalPromoter                           | Lfn5          | 1.542 | 8.4  |
| 14121201 | P205272 Cebpz ProximalPromoter<br>P208130 1810011O10Rik | Cebpz         | 1.541 | 9.95 |
| 14122166 | ProximalPromoter<br>P209404 Unc45a                      | 1810011O10Rik | 1.541 | 6.23 |
| 14119621 | ProximalPromoter                                        | Unc45a        | 1.541 | 7.17 |
| 14116599 | P204694 Mtap1b ProximalPromoter                         | Mtap1b        | 1.54  | 5.28 |
| 14118768 | P210273 Pcsk9 ProximalPromoter                          | Pcsk9         | 1.539 | 5.28 |
| 14122444 | P205705 Pctk1 ProximalPromoter                          | Pctk1         | 1.539 | 5.28 |
| 14112445 | P205380 Eya1 ProximalPromoter<br>P210686 D430020F16     | Eya1          | 1.539 | 0    |
| 14113781 | ProximalPromoter                                        | D430020F16    | 1.538 | 0.5  |
| 14125687 | P107290 Mnt DistalPromoter                              | Mnt           | 1.538 | 1.55 |
| 14128413 | P209462 Kctd9 ProximalPromoter<br>P101650 Rnase4        | Kctd9         | 1.537 | 1.71 |
| 14112210 | ProximalPromoter                                        | Rnase4        | 1.534 | 0    |
| 14129998 | P205354 Ebf2 ProximalPromoter                           | Ebf2          | 1.534 | 6.23 |
| 14129228 | P200318 Dus4l ProximalPromoter                          | Dus4l         | 1.534 | 9.95 |
| 14114515 | P204549 Idh3g ProximalPromoter                          | Idh3g         | 1.534 | 6.23 |
| 14126230 | P202636 Gtpbp8 ProximalPromoter                         | Gtpbp8        | 1.533 | 6.23 |
| 14112267 | P106604 Bcl6b DistalPromoter<br>P101534 Tmem59          | Bcl6b         | 1.533 | 5.28 |
| 14125173 | ProximalPromoter<br>P207338 Mageh1                      | Tmem59        | 1.532 | 7.17 |
| 14119245 | ProximalPromoter                                        | Mageh1        | 1.532 | 2.14 |
| 14113300 | P206421 Park2 ProximalPromoter                          | Park2         | 1.532 | 9.95 |
| 14120039 | P207754 Zmat5 ProximalPromoter                          | Zmat5         | 1.532 | 8.4  |
| 14119257 | P207235 Znrd1 ProximalPromoter<br>P205814 S100a1        | Znrd1         | 1.532 | 1.2  |
| 14117881 | ProximalPromoter<br>P209912 Ndufb11                     | S100a1        | 1.532 | 9.95 |
| 14115062 | ProximalPromoter                                        | Ndufb11       | 1.529 | 5.28 |
| 14121641 | P204884 Rbm4 ProximalPromoter                           | Rbm4          | 1.529 | 5.28 |
| 14122525 | P206657 Ptgds2 ProximalPromoter                         | Ptgds2        | 1.529 | 6.23 |
| 14126054 | P103045 Frzb ProximalPromoter                           | Frzb          | 1.529 | 9.95 |
| 14127606 | P209060 Mrpl1 ProximalPromoter                          | Mrpl1         | 1.528 | 1.2  |
| 14114756 | P103516 Son ProximalPromoter                            | Son           | 1.528 | 9.95 |
| 14119077 | P206215 Mx2 ProximalPromoter                            | Mx2           | 1.527 | 5.28 |
| 14119856 | P105857 Klf10 DistalPromoter<br>P200457 Cacybp          | Klf10         | 1.526 | 8.4  |
| 14127558 | ProximalPromoter                                        | Cacybp        | 1.525 | 9.95 |
| 14118858 | P208086 Vps25 ProximalPromoter                          | Vps25         | 1.524 | 7.17 |
| 14126503 | P106981 Cdk5 DistalPromoter                             | Cdk5          | 1.524 | 3.35 |
| 14122430 | P202213 Tpbg ProximalPromoter                           | Tpbg          | 1.524 | 4.73 |
| 14129764 | P100101 Cdk5 ProximalPromoter                           | Cdk5          | 1.523 | 4.2  |
| 14120742 | P201920 Arsk ProximalPromoter<br>P207801 2410016F19Rik  | Arsk          | 1.523 | 1.55 |
| 14114593 | ProximalPromoter                                        | 2410016F19Rik | 1.522 | 4.73 |
| 14115356 | P204627 Lfng ProximalPromoter                           | Lfng          | 1.521 | 4.2  |
| 14119144 | P206630 Exosc9 ProximalPromoter                         | Exosc9        | 1.521 | 8.4  |

|          |                                                      |           |       |      |
|----------|------------------------------------------------------|-----------|-------|------|
| 14122648 | P100723 Cish ProximalPromoter                        | Cish      | 1.52  | 3.35 |
| 14122410 | P201770 Trub2 ProximalPromoter<br>P210559 Prpf38a    | Trub2     | 1.52  | 0.35 |
| 14118838 | ProximalPromoter                                     | Prpf38a   | 1.519 | 2.14 |
| 14120790 | P203267 Derl1 ProximalPromoter<br>P210747 Csnk1g1    | Derl1     | 1.518 | 6.23 |
| 14118012 | ProximalPromoter                                     | Csnk1g1   | 1.516 | 0.8  |
| 14119581 | P200667 Mcm8 ProximalPromoter                        | Mcm8      | 1.516 | 4.2  |
| 14121804 | P101119 Srp54 ProximalPromoter                       | Srp54     | 1.516 | 5.28 |
| 14117808 | P207003 Rqcd1 ProximalPromoter                       | Rqcd1     | 1.515 | 2.14 |
| 14125104 | P207546 Nudt2 ProximalPromoter                       | Nudt2     | 1.515 | 9.95 |
| 14110842 | P208860 Acox3 ProximalPromoter                       | Acox3     | 1.513 | 5.28 |
| 14121979 | P203147 Elp3 ProximalPromoter<br>P210162 Slc18a1     | Elp3      | 1.513 | 0.94 |
| 14129632 | ProximalPromoter                                     | Slc18a1   | 1.512 | 6.23 |
| 14113258 | P204711 Myt1l ProximalPromoter                       | Myt1l     | 1.51  | 4.2  |
| 14129254 | P208332 Osbp13 ProximalPromoter                      | Osbp13    | 1.509 | 4.2  |
| 14114340 | P103660 Kntc2 ProximalPromoter<br>P209910 Rnu3ip2    | Kntc2     | 1.508 | 0.35 |
| 14127625 | ProximalPromoter                                     | Rnu3ip2   | 1.508 | 9.95 |
| 14129558 | P204965 Slbp ProximalPromoter                        | Slbp      | 1.508 | 6.23 |
| 14112145 | P210588 Dctn5 ProximalPromoter                       | Dctn5     | 1.507 | 6.23 |
| 14126064 | P106700 Fundc2 DistalPromoter                        | Fundc2    | 1.506 | 6.23 |
| 14124535 | P203825 Zfp184 ProximalPromoter<br>P208187 Tnfaip8l2 | Zfp184    | 1.505 | 7.17 |
| 14111315 | ProximalPromoter                                     | Tnfaip8l2 | 1.505 | 1.71 |
| 14118523 | P103415 Ndufb11<br>P209441 AW011752                  | Ndufb11   | 1.505 | 4.2  |
| 14117512 | ProximalPromoter                                     | AW011752  | 1.503 | 6.23 |
| 14117715 | P103739 Ndufb5 ProximalPromoter                      | Ndufb5    | 1.502 | 2.67 |
| 14120439 | P207870 Akt1s1 ProximalPromoter                      | Akt1s1    | 1.501 | 4.2  |
