# Supplementary material
Source: PubMed Central journal article supplement (PMC2776433)
Supplement: 0904849106_ST3_PDF.pdf [file 0904849106_ST3_PDF.pdf]

**Table S3: List of genes differentially regulated in Pdx1<sup>+/-</sup> pancreatic islets compared with Pdx1<sup>+/+</sup> littermates**

| <b>ELEMENT_ID</b> | <b>NAME</b>   | <b>DESCRIPTION</b>                                                                                 | <b>FC</b> | <b>FDR</b> |
|-------------------|---------------|----------------------------------------------------------------------------------------------------|-----------|------------|
| 14191900          | BC026682      | cDNA sequence<br>BC026682<br>v-maf                                                                 | -5.94     | 0.00       |
| 14188049          | Mafa          | musculoaponeurotic<br>fibrosarcoma oncogene<br>family, protein A (avian)                           | -5.01     | 0.00       |
| 14191089          | BC039632      | cDNA sequence<br>BC039632                                                                          | -3.76     | 0.00       |
| 14185872          | Slc2a2        | solute carrier family 2<br>(facilitated glucose<br>transporter), member 2                          | -2.99     | 0.00       |
| 14179698          | 6330442E10Rik | RIKEN cDNA<br>6330442E10 gene                                                                      | -2.87     | 4.16       |
| 14181506          | Zfp646        | zinc finger protein 646<br>RIKEN cDNA                                                              | -2.62     | 0.00       |
| 14191049          | 6330403K07Rik | RIKEN cDNA<br>6330403K07 gene                                                                      | -2.37     | 11.31      |
| 14180283          | 2900001G08Rik | 2900001G08 gene                                                                                    | -2.24     | 5.48       |
| 14188311          | Pax4          | paired box gene 4<br>delta-like 1 homolog<br>(Drosophila); 3-<br>phosphoglycerate<br>dehydrogenase | -2.13     | 5.48       |
| 14185220          | Dlk1; Phgdh   |                                                                                                    | -2.11     | 7.18       |
| 14184847          | Unknown       |                                                                                                    | -2.11     | 5.48       |
| 14181578          | Mc3r          | melanocortin 3 receptor<br>microphthalmia-<br>associated transcription<br>factor                   | -2.06     | 5.48       |
| 14180967          | Mitf          | RIKEN cDNA                                                                                         | -2.05     | 4.16       |
| 14181418          | 6330403K07Rik | 6330403K07 gene<br>transient receptor<br>potential cation channel,<br>subfamily M, member 8        | -2.01     | 7.18       |
| 14179129          | Trpm8         | low density lipoprotein<br>receptor-related protein 2                                              | -1.99     | 5.48       |
| 14186474          | Lrp2          | 3-phosphoglycerate<br>dehydrogenase                                                                | -1.92     | 5.48       |
| 14179711          | Phgdh         |                                                                                                    | -1.90     | 8.77       |
| 14183414          | Foxb1         | forkhead box B1<br>SRY-box containing gene                                                         | -1.88     | 5.48       |
| 14178517          | Sox15         | 15                                                                                                 | -1.87     | 5.48       |
| 14187019          | Gap43         | growth associated protein                                                                          | -1.86     | 5.48       |

|          |               |                                                                             |       |       |
|----------|---------------|-----------------------------------------------------------------------------|-------|-------|
|          |               | 43                                                                          |       |       |
| 14189126 | IMAGE=5661578 |                                                                             | -1.85 | 5.48  |
| 14188529 | Ucn3          | urocortin 3                                                                 | -1.84 | 7.18  |
| 14178900 | Itpkb         | inositol 1,4,5-<br>trisphosphate 3-kinase B<br>one cut domain, family       | -1.84 | 0.00  |
| 14181579 | Onecut2       | member 2                                                                    | -1.83 | 5.48  |
| 14181652 | Nnat          | neuronatin                                                                  | -1.83 | 5.48  |
| 14190555 | Ppp1r1a       | protein phosphatase 1,<br>regulatory (inhibitor)<br>subunit 1A              | -1.82 | 5.48  |
| 14188660 | Ints5         | integrator complex<br>subunit 5                                             | -1.81 | 0.00  |
| 14182695 | Ero1lb        | ERO1-like beta (S.<br>cerevisiae)                                           | -1.80 | 5.48  |
| 14191687 | Rbp4          | retinol binding protein 4,<br>plasma                                        | -1.80 | 4.16  |
| 14189425 | Ero1lb        | ERO1-like beta (S.<br>cerevisiae)                                           | -1.80 | 11.31 |
| 14187757 | Gng12         | guanine nucleotide<br>binding protein (G<br>protein), gamma 12              | -1.79 | 5.48  |
| 14180449 | Psmc1         | protease (prosome,<br>macropain) 26S subunit,<br>ATPase 1                   | -1.78 | 0.00  |
| 14186455 | Ndufs2        | NADH dehydrogenase<br>(ubiquinone) Fe-S protein<br>2                        | -1.77 | 5.48  |
| 14178610 | Ctrl          | chymotrypsin-like<br>procollagen, type VI,                                  | -1.77 | 14.73 |
| 14190079 | Col6a3        | alpha 3                                                                     | -1.75 | 11.31 |
| 14187356 | Hspb7         | heat shock protein family,<br>member 7<br>(cardiovascular)                  | -1.74 | 0.00  |
| 14180998 | Lrrc49        | leucine rich repeat<br>containing 49                                        | -1.74 | 18.15 |
| 14185131 | Unknown       |                                                                             | -1.74 | 18.15 |
| 14182714 | Npy           | neuropeptide Y                                                              | -1.74 | 6.33  |
| 14181033 | Slc37a4       | solute carrier family 37<br>(glycerol-6-phosphate<br>transporter), member 4 | -1.74 | 5.48  |
| 14183135 | Rbp4          | retinol binding protein 4,<br>plasma                                        | -1.73 | 0.00  |
| 14182750 | Rnase4        | ribonuclease, RNase A<br>family 4                                           | -1.72 | 5.48  |
| 14189523 | Papss2        | 3'-phosphoadenosine 5'-                                                     | -1.70 | 7.18  |

|          |               |                                                                |       |       |
|----------|---------------|----------------------------------------------------------------|-------|-------|
|          |               | phosphosulfate synthase<br>2                                   |       |       |
| 14184401 | Rhobtb1       | Rho-related BTB domain<br>containing 1                         | -1.69 | 7.18  |
| 14191108 | Unknown       |                                                                | -1.68 | 0.00  |
| 14187545 | Rnase4        | ribonuclease, RNase A<br>family 4                              | -1.68 | 5.48  |
| 14180691 | Gja1          | gap junction membrane<br>channel protein alpha 1               | -1.66 | 8.77  |
| 14190759 | Pax7          | paired box gene 7                                              | -1.65 | 5.48  |
| 14182692 | Fbxl17        | F-box and leucine-rich<br>repeat protein 17                    | -1.62 | 5.48  |
| 14181298 | Dhrs4         | dehydrogenase/reductase<br>(SDR family) member 4               | -1.60 | 6.33  |
| 14180966 | Irs2          | insulin receptor substrate<br>2                                | -1.58 | 4.16  |
| 14180600 | 4932416N17Rik | RIKEN cDNA<br>4932416N17 gene                                  | -1.58 | 6.33  |
| 14186900 | Ctrb1         | chymotrypsinogen B1                                            | -1.57 | 8.77  |
| 14188095 | Creg1         | cellular repressor of E1A-<br>stimulated genes 1               | -1.57 | 4.16  |
| 14186593 | Cel           | carboxyl ester lipase                                          | -1.57 | 8.77  |
| 14179210 | Gng12         | guanine nucleotide<br>binding protein (G<br>protein), gamma 12 | -1.57 | 6.33  |
| 14183312 | IMAGE=5679208 |                                                                | -1.57 | 7.18  |
| 14189040 | Ctrb1         | chymotrypsinogen B1                                            | -1.56 | 11.31 |
| 14178664 | Cbs           | cystathionine beta-<br>synthase                                | -1.56 | 18.15 |
| 14185871 | Slit3         | slit homolog 3<br>(Drosophila)                                 | -1.55 | 5.48  |
| 14183698 | Mmp2          | matrix metalloproteinase 2<br>tubulin-specific                 | -1.55 | 11.31 |
| 14179490 | Tbcd          | chaperone d                                                    | -1.55 | 5.48  |
| 14188304 | Insl3         | insulin-like 3                                                 | -1.54 | 5.48  |
| 14181684 | Ftl1          | ferritin light chain 1                                         | -1.54 | 11.31 |
| 14190109 | Prkcb1        | protein kinase C, beta 1                                       | -1.54 | 5.48  |
| 14183539 | Phgdh         | 3-phosphoglycerate<br>dehydrogenase                            | -1.53 | 18.15 |
| 14178921 | Arl4c         | ADP-ribosylation factor-<br>like 4C                            | -1.52 | 5.48  |
| 14182276 | Ctrb1         | chymotrypsinogen B1                                            | -1.51 | 14.73 |
| 14191953 | Rtn3          | reticulon 3                                                    | -1.50 | 8.77  |
| 14183416 | Atp2a3        | ATPase, Ca <sup>++</sup><br>transporting, ubiquitous           | -1.50 | 4.16  |
| 14185649 | Pard6g        | par-6 partitioning                                             | -1.50 | 11.31 |

|          |               |                                                                                                              |       |       |
|----------|---------------|--------------------------------------------------------------------------------------------------------------|-------|-------|
| 14184987 | IMAGE=6430730 | defective 6 homolog<br>gamma (C. elegans)                                                                    | -1.50 | 5.48  |
| 14189328 | Xlkd1         | extra cellular link domain-<br>containing 1                                                                  | -1.49 | 5.48  |
| 14180408 | Ins1          | insulin I                                                                                                    | -1.49 | 5.48  |
| 14180867 | Rhobtb1       | Rho-related BTB domain<br>containing 1                                                                       | -1.49 | 5.48  |
| 14190425 | Hadh; Slc39a5 | hydroxyacyl-Coenzyme A<br>dehydrogenase; solute<br>carrier family 39 (metal<br>ion transporter), member<br>5 | -1.48 | 8.77  |
| 14182100 | Rbp4          | retinol binding protein 4,<br>plasma<br>OCIA domain containing<br>2                                          | -1.48 | 7.18  |
| 14188837 | Ociad2        | 2                                                                                                            | -1.48 | 5.48  |
| 14182061 | Setd5         | SET domain containing 5                                                                                      | -1.48 | 5.48  |
| 14186314 | Adora1        | adenosine A1 receptor                                                                                        | -1.47 | 5.48  |
| 14190776 | IMAGE=6430091 |                                                                                                              | -1.47 | 5.48  |
| 14182093 | Myo1b         | myosin IB                                                                                                    | -1.47 | 11.31 |
| 14185348 | Prlr          | prolactin receptor                                                                                           | -1.47 | 5.48  |
| 14185863 | Pgr           | progesterone receptor<br>cytoplasmic<br>polyadenylation element<br>binding protein 1                         | -1.47 | 5.48  |
| 14180031 | Cpeb1         | adenylate cyclase                                                                                            | -1.47 | 5.48  |
| 14180280 | Adcyap1       | activating polypeptide 1                                                                                     | -1.46 | 11.31 |
| 14190974 | Cdkn1c        | cyclin-dependent kinase<br>inhibitor 1C (P57)                                                                | -1.46 | 5.48  |
| 14191697 | Hadh          | hydroxyacyl-Coenzyme A<br>dehydrogenase<br>angiogenin, ribonuclease<br>A family, member 1                    | -1.46 | 18.15 |
| 14180958 | Ang1          | A family, member 1                                                                                           | -1.46 | 7.18  |
| 14178543 | Ela2a         | elastase 2A                                                                                                  | -1.45 | 8.77  |
| 14190500 | Ela1          | elastase 1, pancreatic                                                                                       | -1.45 | 12.79 |
| 14182673 | IMAGE=5682532 |                                                                                                              | -1.45 | 5.48  |
| 14178498 | Npc2          | Niemann Pick type C2<br>similar to hypothetical<br>protein FLJ12895                                          | -1.45 | 8.77  |
| 14190818 | LOC232875     | protein FLJ12895                                                                                             | -1.45 | 5.48  |
| 14182470 | Pcx           | pyruvate carboxylase                                                                                         | -1.45 | 7.18  |
| 14181317 | Tor2a         | torsin family 2, member A                                                                                    | -1.45 | 6.33  |
| 14179049 | IMAGE=5669426 |                                                                                                              | -1.44 | 5.48  |
| 14189144 | Aldh1l2       | aldehyde dehydrogenase<br>1 family, member L2                                                                | -1.43 | 5.48  |
| 14181043 | Ftl1          | ferritin light chain 1                                                                                       | -1.43 | 5.48  |

|          |                |                                                                            |       |       |
|----------|----------------|----------------------------------------------------------------------------|-------|-------|
|          |                | NADH dehydrogenase subunit 1; NADH dehydrogenase subunit 2; immature colon |       |       |
| 14179707 | ND1; ND2; Ict1 | carcinoma transcript 1                                                     | -1.43 | 7.18  |
| 14190604 | Rab6           | RAB6, member RAS oncogene family                                           | -1.43 | 5.48  |
| 14186728 | Sars           | seryl-aminoacyl-tRNA synthetase                                            | -1.43 | 12.79 |
| 14184134 | IMAGE=6433796  |                                                                            | -1.43 | 14.73 |
| 14184027 | Gpbar1         | G protein-coupled bile acid receptor 1                                     | -1.43 | 5.48  |
| 14187879 | Tgfa           | transforming growth factor alpha                                           | -1.42 | 5.48  |
| 14180435 | Ins2           | insulin II                                                                 | -1.42 | 5.48  |
| 14191274 | Adarb1         | adenosine deaminase, RNA-specific, B1                                      | -1.42 | 5.48  |
| 14186196 | Cd63           | Cd63 antigen                                                               | -1.42 | 7.18  |
| 14180644 | Arl15          | ADP-ribosylation factor-like 15                                            | -1.41 | 5.48  |
| 14189733 | Rtn4           | reticulon 4                                                                | -1.41 | 5.48  |
| 14188922 | Trim54         | tripartite motif-containing 54                                             | -1.41 | 6.33  |
| 14180953 | Ddit3          | DNA-damage inducible transcript 3                                          | -1.40 | 5.48  |
| 14186141 | Sars           | seryl-aminoacyl-tRNA synthetase                                            | -1.40 | 14.73 |
| 14182878 | Lrp1rc         | leucine-rich PPR-motif containing                                          | 1.40  | 4.22  |
| 14182649 | Ncam1          | neural cell adhesion molecule 1                                            | 1.40  | 3.62  |
| 14189991 | Col4a2         | procollagen, type IV, alpha 2                                              | 1.40  | 6.33  |
| 14190162 | AW046287       | expressed sequence AW046287                                                | 1.40  | 11.31 |
| 14183873 | Kcnk1          | potassium channel, subfamily K, member 1                                   | 1.41  | 3.71  |
| 14181520 | Irf1           | interferon regulatory factor 1                                             | 1.41  | 4.22  |
| 14187150 | Gpx2           | glutathione peroxidase 2                                                   | 1.41  | 5.26  |
| 14183476 | Chga           | chromogranin A                                                             | 1.41  | 12.79 |
| 14183049 | Dck            | deoxycytidine kinase                                                       | 1.41  | 5.06  |
| 14185326 | Pgam1          | phosphoglycerate mutase 1                                                  | 1.42  | 3.21  |
| 14189752 | Peci           | peroxisomal delta3, delta2-enoyl-Coenzyme A                                | 1.42  | 7.18  |

|          |               | isomerase                                                                  |      |       |
|----------|---------------|----------------------------------------------------------------------------|------|-------|
| 14184982 | Tmcc3         | transmembrane and coiled coil domains 3 isopentenyl-diphosphate            | 1.42 | 3.71  |
| 14190408 | Idi1          | delta isomerase                                                            | 1.42 | 6.33  |
| 14189478 | Sdcbp         | syndecan binding protein Josephin domain                                   | 1.43 | 14.73 |
| 14185381 | Josd3         | containing 3 sine oculis-related                                           | 1.43 | 12.79 |
| 14181896 | Six4          | homeobox 4 homolog (Drosophila)                                            | 1.44 | 5.26  |
| 14188295 | Cnot6l        | CCR4-NOT transcription complex, subunit 6-like                             | 1.44 | 18.15 |
| 14191578 | Man2a1        | mannosidase 2, alpha 1                                                     | 1.44 | 3.21  |
| 14185678 | Rbbp7         | retinoblastoma binding protein 7                                           | 1.45 | 14.73 |
| 14179995 | Ggcx          | gamma-glutamyl carboxylase                                                 | 1.45 | 3.62  |
| 14181538 | Fgf1          | fibroblast growth factor 1                                                 | 1.45 | 12.79 |
| 14178621 | Cd81          | CD 81 antigen                                                              | 1.45 | 8.77  |
| 14191521 | Gnas          | GNAS (guanine nucleotide binding protein, alpha stimulating) complex locus | 1.45 | 12.79 |
| 14186923 | Ucp2          | uncoupling protein 2 (mitochondrial, proton carrier)                       | 1.46 | 14.73 |
| 14189926 | Tagln2        | transgelin 2                                                               | 1.46 | 3.87  |
| 14183000 | Slc29a1       | solute carrier family 29 (nucleoside transporters), member 1               | 1.46 | 3.71  |
| 14192096 | Cd81          | CD 81 antigen                                                              | 1.46 | 14.73 |
| 14191414 | Mef2c         | myocyte enhancer factor 2C                                                 | 1.46 | 8.77  |
| 14183322 | Plvap         | plasmalemma vesicle associated protein                                     | 1.47 | 18.15 |
| 14179648 | IMAGE=5945372 |                                                                            | 1.47 | 14.73 |
| 14179774 | Scg5          | secretogranin V                                                            | 1.47 | 8.77  |
| 14187928 | Uox           | urate oxidase                                                              | 1.47 | 7.18  |
| 14188583 | Anxa11        | annexin A11                                                                | 1.47 | 3.71  |
| 14191817 | Ssr3          | signal sequence receptor, gamma                                            | 1.48 | 14.73 |
| 14181221 | Dnaja4        | DnaJ (Hsp40) homolog, subfamily A, member 4                                | 1.49 | 8.77  |
| 14187048 | Gnas          | GNAS (guanine nucleotide binding                                           | 1.49 | 12.79 |

|          |               |                                                                                                                 |      |       |
|----------|---------------|-----------------------------------------------------------------------------------------------------------------|------|-------|
|          |               | protein, alpha stimulating)<br>complex locus                                                                    |      |       |
| 14179141 | Resp18        | regulated endocrine-<br>specific protein 18                                                                     | 1.49 | 3.71  |
| 14187746 | Btbd7         | BTB (POZ) domain<br>containing 7                                                                                | 1.50 | 5.06  |
| 14187959 | Adamts1       | a disintegrin-like and<br>metallopeptidase<br>(reprolysin type) with<br>thrombospondin type 1<br>motif, 1       | 1.51 | 18.15 |
| 14191627 | Egr1          | early growth response 1                                                                                         | 1.52 | 14.73 |
| 14181508 | Gnas; Gm1568  | GNAS (guanine<br>nucleotide binding<br>protein, alpha stimulating)<br>complex locus; gene<br>model 1568, (NCBI) | 1.52 | 12.79 |
| 14191969 | Abcb4         | ATP-binding cassette,<br>sub-family B (MDR/TAP),<br>member 4                                                    | 1.53 | 5.06  |
| 14190798 | Lgals3bp      | lectin, galactoside-<br>binding, soluble, 3 binding<br>protein                                                  | 1.53 | 3.21  |
| 14189191 | Serpina1c     | serine (or cysteine)<br>peptidase inhibitor, clade<br>A, member 1c                                              | 1.54 | 6.33  |
| 14188662 | Pgrmc1        | progesterone receptor<br>membrane component 1                                                                   | 1.54 | 14.73 |
| 14180415 | 1810073N04Rik | RIKEN cDNA<br>1810073N04 gene                                                                                   | 1.55 | 3.71  |
| 14187139 | Serping1      | serine (or cysteine)<br>peptidase inhibitor, clade<br>G, member 1                                               | 1.56 | 14.73 |
| 14180338 | Aip           | aryl-hydrocarbon<br>receptor-interacting<br>protein                                                             | 1.56 | 3.71  |
| 14185181 | Lgals3bp      | lectin, galactoside-<br>binding, soluble, 3 binding<br>protein                                                  | 1.57 | 3.87  |
| 14183645 | Slc29a1       | solute carrier family 29<br>(nucleoside transporters),<br>member 1                                              | 1.58 | 3.71  |
| 14184879 | Tagln3        | transgelin 3                                                                                                    | 1.60 | 18.15 |
| 14182031 | Scn2b         | sodium channel, voltage-<br>gated, type II, beta                                                                | 1.61 | 3.21  |
| 14184008 | Pfkfb3        | 6-phosphofructo-2-                                                                                              | 1.61 | 3.21  |

|          |                  |                                                                                     |      |           |
|----------|------------------|-------------------------------------------------------------------------------------|------|-----------|
|          |                  | kinase/fructose-2,6-<br>biphosphatase 3                                             |      |           |
| 14187404 | Tgfr3            | transforming growth<br>factor, beta receptor III                                    | 1.61 | 3.71      |
| 14181589 | G6pc             | glucose-6-phosphatase,<br>catalytic                                                 | 1.62 | 5.06      |
| 14180080 | Hist1h1c         | histone cluster 1, H1c                                                              | 1.63 | 3.71      |
| 14185091 | Myh10            | myosin, heavy<br>polypeptide 10, non-<br>muscle                                     | 1.63 | 3.62      |
| 14184698 | 5730509K17Rik    | RIKEN cDNA<br>5730509K17 gene                                                       | 1.63 | 3.21      |
| 14189992 | Maged2           | melanoma antigen, family<br>D, 2                                                    | 1.64 | 5.06      |
| 14183703 | Prss23           | protease, serine, 23                                                                | 1.65 | 3.21      |
| 14180042 | GENBANK=CF622970 |                                                                                     |      | 1.65 6.33 |
| 14191241 | Fxyd6            | FXYD domain-containing<br>ion transport regulator 6                                 | 1.66 | 3.71      |
| 14186461 | Gdf10            | growth differentiation<br>factor 10                                                 | 1.66 | 12.79     |
| 14182612 | Scg2             | secretogranin II                                                                    | 1.66 | 14.73     |
| 14190219 | Gc               | group specific component                                                            | 1.67 | 3.71      |
| 14181397 | Vtn              | vitronectin                                                                         | 1.67 | 5.26      |
| 14185932 | Gucy2c           | guanylate cyclase 2c<br>cysteine-rich with EGF-<br>like domains 2                   | 1.67 | 3.87      |
| 14187738 | Creld2           |                                                                                     | 1.70 | 4.22      |
| 14182491 | Rpl17            | ribosomal protein L17                                                               | 1.70 | 3.62      |
| 14190598 | Anxa4            | annexin A4                                                                          | 1.73 | 3.71      |
| 14189803 | Icam1            | intercellular adhesion<br>molecule                                                  | 1.73 | 3.21      |
| 14190016 | 5330417C22Rik    | RIKEN cDNA<br>5330417C22 gene                                                       | 1.73 | 3.71      |
| 14177944 | Tspan33          | tetraspanin 33                                                                      | 1.74 | 3.21      |
| 14190800 | Man1a            | mannosidase 1, alpha                                                                | 1.75 | 3.21      |
| 14187691 | Ace2             | angiotensin I converting<br>enzyme (peptidyl-<br>dipeptidase A) 2                   | 1.75 | 3.87      |
| 14179442 | Pim2             | proviral integration site 2                                                         | 1.76 | 3.21      |
| 14179424 | Fhl2             | four and a half LIM<br>domains 2                                                    | 1.76 | 3.62      |
| 14179446 | Prss23           | protease, serine, 23                                                                | 1.77 | 3.21      |
| 14182933 | Gnas             | GNAS (guanine<br>nucleotide binding<br>protein, alpha stimulating)<br>complex locus | 1.77 | 4.22      |
| 14186619 | Rpa1             | replication protein A1                                                              | 1.78 | 3.62      |



|          |               |                                                            |      |       |
|----------|---------------|------------------------------------------------------------|------|-------|
| 14179209 | Txnip         | thioredoxin interacting protein                            | 1.82 | 12.79 |
| 14185635 | Cd44          | CD44 antigen                                               | 1.88 | 3.71  |
| 14190981 | Hap1          | huntingtin-associated protein 1                            | 1.90 | 3.71  |
| 14178468 | Sult1d1       | sulfotransferase family 1D, member 1                       | 1.94 | 12.79 |
| 14191453 | Pgf           | placental growth factor                                    | 1.94 | 3.62  |
| 14192544 | Cfh           | complement component factor h                              | 1.97 | 14.73 |
| 14178946 | Arrdc4        | arrestin domain containing 4                               | 1.98 | 5.26  |
| 14185546 | Dach2         | dachshund 2 (Drosophila)                                   | 1.98 | 3.21  |
| 14192312 | 2700008G24Rik | RIKEN cDNA 2700008G24 gene                                 | 1.99 | 11.31 |
| 14182476 | Fxyd3         | FXYD domain-containing ion transport regulator 3           | 2.00 | 3.87  |
| 14187627 | Sez6l         | seizure related 6 homolog like                             | 2.02 | 3.71  |
| 14181180 | Fxyd3         | FXYD domain-containing ion transport regulator 3           | 2.02 | 3.87  |
| 14188866 | Klf10         | Kruppel-like factor 10                                     | 2.02 | 3.71  |
| 14182643 | Chgb          | chromogranin B                                             | 2.05 | 3.62  |
| 14185758 | Fxyd3         | FXYD domain-containing ion transport regulator 3           | 2.08 | 5.06  |
| 14180899 | Tagln3        | transgelin 3                                               | 2.09 | 14.73 |
| 14180296 | Txnip         | thioredoxin interacting protein                            | 2.21 | 5.26  |
| 14178816 | Neurog3       | neurogenin 3                                               | 2.22 | 3.21  |
| 14184569 | Arhgef2       | rho/rac guanine nucleotide exchange factor (GEF) 2         | 2.34 | 3.21  |
| 14183973 | Cd81          | CD 81 antigen                                              | 2.34 | 3.71  |
| 14188381 | Tmem27        | transmembrane protein 27                                   | 2.46 | 3.62  |
| 14188629 | Ace2          | angiotensin I converting enzyme (peptidyl-dipeptidase A) 2 | 2.55 | 3.62  |
| 14188321 | Pyy           | peptide YY                                                 | 2.59 | 6.33  |
| 14192234 | Tspan8        | tetraspanin 8                                              | 2.62 | 3.21  |
| 14188316 | Neurog3       | neurogenin 3                                               | 2.90 | 0.00  |
| 14191154 | Ghrl          | ghrelin                                                    | 3.34 | 3.71  |
| 14188814 | Igk-C         | immunoglobulin kappa chain, constant region                | 4.35 | 4.22  |
| 14179056 | Cpb2          | carboxypeptidase B2 (plasma)                               | 5.16 | 0.00  |

|          |           |                                             |      |      |
|----------|-----------|---------------------------------------------|------|------|
| 14186398 | Igh-VJ558 | immunoglobulin heavy<br>chain (J558 family) | 6.21 | 3.87 |
|----------|-----------|---------------------------------------------|------|------|
