# Supplementary material
Source: PubMed Central journal article supplement (PMC2776433)
Supplement: 0904849106_ST4_PDF.pdf [file 0904849106_ST4_PDF.pdf]

Table S4.

|                       |                           |                                                                          | <i>Pdx1</i> <sup>+/-</sup> vs. <i>Pdx1</i> <sup>+/+</sup> Primary Islets |      | Adsh <i>Pdx1</i> vs. AdshLuc tx'd MIN6 cells |      |
|-----------------------|---------------------------|--------------------------------------------------------------------------|--------------------------------------------------------------------------|------|----------------------------------------------|------|
| NAME                  | SYNONYMS                  | DESCRIPTION                                                              | FC                                                                       | FDR  | FC                                           | FDR  |
| <i>Downregulated:</i> |                           |                                                                          |                                                                          |      |                                              |      |
| * Mafa                | RIPE3b1                   | v-maf musculoaponeurotic fibrosarcoma oncogene family, protein A (avian) | -5.01                                                                    | 0.00 | -1.57                                        | 0.00 |
| * Slc2a2              | Glut2                     | solute carrier family 2 (facilitated glucose transporter), member 2      | -2.99                                                                    | 0.00 | -1.62                                        | 0.00 |
| * Pax4                |                           | paired box gene 4                                                        | -2.13                                                                    | 5.48 | -1.49                                        | 0.94 |
| Mitf                  | bw; mi; vit; vitiligo; wh | microphthalmia-associated transcription factor                           | -2.05                                                                    | 4.16 | -1.56                                        | 0.00 |
| Lrp2                  | Gp330; Megalin            | low density lipoprotein receptor-related protein 2                       | -1.92                                                                    | 5.48 | -1.41                                        | 0.94 |
| Nnat                  | Peg5                      | neuronatin                                                               | -1.83                                                                    | 5.48 | -1.65                                        | 0.00 |
| Ero1lb                | ero1-beta                 | ERO1-like beta ( <i>S. cerevisiae</i> )                                  | -1.80                                                                    | 5.48 | -1.56                                        | 0.00 |
| Setd5                 |                           | SET domain containing 5                                                  | -1.48                                                                    | 5.48 | -2.13                                        | 0.00 |
| <i>Upregulated:</i>   |                           |                                                                          |                                                                          |      |                                              |      |
| Tspan8                | Tm4sf3                    | tetraspanin 8                                                            | 2.62                                                                     | 3.21 | 1.70                                         | 0.00 |
| Fhl2                  | SLIM3                     | four and a half LIM domains 2                                            | 1.76                                                                     | 3.62 | 1.45                                         | 0.74 |
| Rpl17                 |                           | ribosomal protein L17                                                    | 1.70                                                                     | 3.62 | 1.48                                         | 0.74 |
|                       | GENBANK=CF622970          |                                                                          | 1.65                                                                     | 6.33 | 1.44                                         | 0.74 |
| Serpina1c             | PI3; Spi1-3               | serine (or cysteine) peptidase inhibitor, clade A, member 1c             | 1.54                                                                     | 6.33 | 1.74                                         | 0.00 |
| Pgam1                 | Pgam-1                    | phosphoglycerate mutase 1                                                | 1.42                                                                     | 3.21 | 1.47                                         | 0.00 |
| Gpx2                  | GPx-GI<br>GP130; LSFC;    | glutathione peroxidase 2                                                 | 1.41                                                                     | 5.26 | 1.47                                         | 0.51 |
| Lrp13                 | Lrp130                    | leucine-rich PPR-motif containing                                        | 1.40                                                                     | 4.22 | 1.51                                         | 0.51 |

\*= known *Pdx1* target
