# Supplementary material
Source: PubMed Central journal article supplement (PMC2776433)
Supplement: 0904849106_ST5_PDF.pdf [file 0904849106_ST5_PDF.pdf]

**Table S5.****Sequences of newly-designed primers used for qPCR analyses.**

|                 |                |                             |
|-----------------|----------------|-----------------------------|
| <b>Ero1lb</b>   | <i>Forward</i> | 5'-AGCTGGTCCCAGTGACAGAAA-3' |
|                 | <i>Reverse</i> | 5'-ACAGCCCTGCATTACAGAGGA-3' |
| <b>Nnat</b>     | <i>Forward</i> | 5'-TCTGGACCAAGTCGGAACAGT-3' |
|                 | <i>Reverse</i> | 5'-TGTAGGGCTTCAGCTGGTGAT-3' |
| <b>Pdia4</b>    | <i>Forward</i> | 5'-GTAGCGAAGATCGATGCAACC-3' |
|                 | <i>Reverse</i> | 5'-CAGGATCTTGATGGTGGGGTA-3' |
| <b>Pdia6</b>    | <i>Forward</i> | 5'-AAACATCAGTCCCTGGGAGGT-3' |
|                 | <i>Reverse</i> | 5'-CGGCATCTACAATGGCTTCTC-3' |
| <b>Edem3</b>    | <i>Forward</i> | 5'-CACCTTGATCCTCGAGTTTGC-3' |
|                 | <i>Reverse</i> | 5'-TCGCTGTCTTTTCTCCAGAG-3'  |
| <b>Dnajc10</b>  | <i>Forward</i> | 5'-ATCGGAGCTGTCAACTGTGGT-3' |
|                 | <i>Reverse</i> | 5'-ACTGCAGCCATTCCAGACCTA-3' |
| <b>Atf4</b>     | <i>Forward</i> | 5'-GCAGTGTTGCTGTAACGGACA-3' |
|                 | <i>Reverse</i> | 5'-CGCTGTTCAGGAAGCTCATCT-3' |
| <b>Eif4ebp1</b> | <i>Forward</i> | 5'-TGCTACTGCAGGGGAATGACT-3' |
|                 | <i>Reverse</i> | 5'-ACCCAGCCTAAGGAAAGATGG-3' |
| <b>Trib3</b>    | <i>Forward</i> | 5'-CTGTGCCAAAGACCAAAGTCC-3' |
|                 | <i>Reverse</i> | 5'-CTTGAATCCCACAGCCAAGTC-3' |
| <b>HPRT</b>     | <i>Forward</i> | 5'-TGCTCGAGATGTCATGAAGGA-3' |
|                 | <i>Reverse</i> | 5'-CCAGCAGGTCAGCAAAGAACT-3' |
